## Title

Chromatin at X-linked repeats that guide dosage compensation in *Drosophila melanogaster* is modulated by the siRNA pathway

## Authors

Nikita Deshpande and Victoria H. Meller<sup>1</sup>

## Author affiliations

Department of Biological Sciences, Wayne State University, Detroit Michigan 48202

## Running title (~35 characters)

Modification of 1.688<sup>X</sup> chromatin by siRNA (36 characters)

## Key words

*Ago2*, dosage compensation, chromatin modification, satellite repeats, 1.688<sup>X</sup> repeats, 359 bp repeats, *roX1 roX2*, X chromosome recognition

1      Communicating author:  
5047 Gullen Mall  
Wayne State University  
Detroit MI 48202  
Phone:      313-577-3451  
Fax:      313-577-6891  
[vmeller@biology.biosci.wayne.edu](mailto:vmeller@biology.biosci.wayne.edu)

## Abstract

Many heterogametic organisms adjust sex chromosome expression to accommodate differences in gene dosage. This requires selective recruitment of regulatory factors to the modulated chromosome. How these factors are localized to a chromosome with requisite accuracy is poorly understood. *Drosophila melanogaster* males increase expression from their single X chromosome. Identification of this chromosome involves cooperation between different classes of X-identity elements. The Chromatin Entry Sites (CES) recruit a chromatin-modifying complex that spreads into nearby genes and increases expression. In addition, a family of satellite repeats that is enriched on the X chromosome, the 1.688<sup>X</sup> repeats, promotes recruitment of the complex to nearby genes. The 1.688<sup>X</sup> repeats and CES are dissimilar, and appear to operate through different mechanisms. Interestingly, the siRNA pathway and siRNA from a 1.688<sup>X</sup> repeat also promote X recognition. We postulate that siRNA-dependent modification of 1.688<sup>X</sup> chromatin contributes to recognition of nearby genes. In accord with this, we found enrichment of the siRNA effector Argonaute2 (Ago2) at some 1.688<sup>X</sup> repeats. Mutations in several proteins that physically interact with Ago2, including the histone methyltransferase Su(var)3-9, enhance the lethality of males with defective X recognition. Su(var)3-9 deposits H3K9me2 on some 1.688<sup>X</sup> repeats, and this mark is disrupted upon ectopic expression of 1.688<sup>X</sup> siRNA. Furthermore, integration of 1.688<sup>X</sup> DNA on an autosome induces local H3K9me2 deposition, but enhances expression of nearby genes in a siRNA-dependent manner. Our findings are consistent with a model in which siRNA-directed modification of 1.688<sup>X</sup> chromatin contributes to recognition of the fly X chromosome by the MSL complex.

## Introduction

Males of many species carry one X chromosome and a gene-poor Y chromosome.

Hemizygosity of the male X chromosome produces a potentially lethal imbalance in the ratio of X to autosomal gene products. This imbalance is corrected by a process known as dosage compensation, a specialized type of gene regulation that modulates expression of an entire chromosome. Different strategies to achieve dosage compensation have evolved independently. In *Drosophila melanogaster*, males increase X-linked gene expression by approximately two-fold (LUCCHESI *et al.* 2005). This involves the activity of the Male Specific Lethal (MSL) complex. The MSL complex is recruited to active genes on the X chromosome, where it modifies chromatin to increase expression (LUCCHESI AND KURODA 2015). The MSL complex contains five proteins, Male-Specific Lethal 1, -2, and -3 (MSL1, -2, -3), Maleless (MLE), and Males Absent on the First (MOF) (reviewed in (KOYA AND MELLER 2011)). Enhanced transcription by the MSL complex is associated with H4K16 acetylation by MOF (AKHTAR AND BECKER 2000; SMITH *et al.* 2000). H4K16 acetylation decompacts chromatin, and this may enhance transcriptional elongation of X-linked genes (SHOGREN-KNAAK *et al.* 2006; LARSCHAN *et al.* 2011).

The MSL complex also contains one of two non-coding *RNA on the X (roX1, -2)* transcripts (QUINN *et al.* 2014). While elimination of any one of the MSL proteins is lethal to males, *roX1* and *roX2* are redundant for compensation. Mutation of both *roX* genes leads to mislocalization of the MSL proteins to ectopic autosomal sites in male larvae (MELLER AND RATTNER 2002; DENG AND MELLER 2006). X-linked gene expression is reduced in these males, as is survival to adulthood. Both *roX* genes are located on

the X chromosome, and both overlap Chromatin Entry Sites (CES), specialized sites with increased affinity for the MSL complex (KELLEY *et al.* 1999; ALEKSEYENKO *et al.* 2008; STRAUB *et al.* 2008).

Although much is known about the role of MSL complex in dosage compensation, how this complex selectively targets the X chromosome is poorly understood. Recognition and binding to X chromatin is believed to be a two-step process. Initial recruitment of the MSL complex to CES is followed by spreading into nearby transcribed genes (GELBART AND KURODA 2009). Contained within the CES are motifs called MSL Recognition Elements (MREs) (ALEKSEYENKO *et al.* 2008; STRAUB *et al.* 2008). MREs are 21 bp GA-rich motifs that bind Chromatin-Linked Adaptor for MSL Protein (CLAMP), a zinc finger protein that is essential for MSL recruitment (SORUCO *et al.* 2013). Spreading into nearby active genes is supported by interaction of MSL3 with the cotranscriptional H3K36me3 mark (KIND AND AKHTAR 2007; LARSCHAN *et al.* 2007; SURAL *et al.* 2008). These mechanisms describe local recruitment of the MSL complex, but fail to explain how the MSL complex specifically targets the X-chromosome. H3K36me3 is found on active genes throughout the genome, and MREs are only modestly enriched on the X chromosome. Furthermore, CLAMP binds MREs throughout the genome, but only recruits the MSL complex to X-linked CES (ALEKSEYENKO *et al.* 2008; SORUCO *et al.* 2013). We conclude that additional mechanisms must distinguish X and autosomal chromatin.

X-localization is disrupted in *roX1 roX2* males, making them a sensitized genetic background that can be used to identify additional factors contributing to X recognition.

Using this strategy, our laboratory demonstrated a role for the siRNA pathway in recognition of the X-chromosome (MENON AND MELLER 2012; MENON *et al.* 2014). A likely source of siRNA is a family of repeats that is near exclusive to the X chromosome. These are the AT rich, 359 bp 1.688<sup>X</sup> satellite repeats, a clade of which is found in short, tandem arrays throughout X euchromatin (HSIEH AND BRUTLAG 1979; WARING AND POLLACK 1987; DIBARTOLOMEIS *et al.* 1992; GALLACH 2014). Specific clusters are denoted by a superscript indicating cytological position. In support of the idea that 1.688<sup>X</sup> repeats assist X recognition, ectopic production of siRNA from one repeat partially rescues *roX1 roX2* males (MENON *et al.* 2014). 1.688<sup>X</sup> repeats are often close to or within genes, leading to the idea that they function as “tuning knobs” for gene regulation (KUHN *et al.* 2012). In accord with these ideas, autosomal insertions of 1.688<sup>X</sup> DNA enable recruitment of functional dosage compensation to nearby autosomal genes (JOSHI AND MELLER 2017).

The 1.688<sup>X</sup> repeats share no sequence identity with the CES, and appear to act in a genetically distinct manner (JOSHI AND MELLER 2017). The question of how 1.688<sup>X</sup> DNA promotes compensation of nearby genes is thus of great interest. We pursued the idea that siRNA-directed modifications of chromatin at 1.688<sup>X</sup> repeats link the repeats and the siRNA pathway to X recognition. Reduction of the siRNA-binding effector protein Argonaute 2 (Ago2) enhances the lethality of partial loss of function *roX1 roX2* mutations, and further reduces X-localization of MSL proteins (MENON AND MELLER 2012). We hypothesized that an Ago2-containing complex might localize to and modify 1.688<sup>X</sup> chromatin in otherwise wild type flies. In accord with this idea, we find that Ago2 is enriched at 1.688<sup>X</sup> repeats. Proteins interacting with Ago2 may also play a role in

dosage compensation. To address this, we tested high confidence Ago2-binding proteins for genetic interactions with *roX1 roX2*, and found that mutations in several of these genes further reduced the survival of *roX1 roX2* males. Of particular interest is the H3K9 methyltransferase *Su(var)3-9*, which is responsible for enrichment of H3K9me2 at a subset of 1.688<sup>X</sup> repeats. H3K9me2 enrichment is disrupted upon ectopic expression of 1.688<sup>X</sup> siRNA. Chromatin flanking an autosomal insertion of 1.688<sup>X</sup> DNA is enriched for H3K9me2, and enrichment is enhanced by ectopic expression of 1.688<sup>X</sup> siRNA. In contrast to the repressive nature of H3K9me2, we find that expression of autosomal genes close to the 1.688<sup>X</sup> transgene is increased in male larvae, and further elevated by ectopic production of 1.688<sup>X</sup> siRNA. These findings support the idea that X recognition and transcriptional upregulation by dosage compensation are distinct processes, and propose that siRNA-dependent modification of chromatin in or near 1.688<sup>X</sup> repeats contributes to X recognition in wild type flies. We propose that epigenetic modifications link the siRNA pathway, 1.688<sup>X</sup> repeats on the X chromosome and X recognition.

## Materials and Methods

### Fly culture and Genetics

Mutations *Dcr1*<sup>Q1147X</sup> (BDSC #32066), *Rm62*<sup>01086</sup> (BDSC #11520), *Fmr1*<sup>Δ113m</sup> (BDSC #67403), *Su(var)3-9*<sup>1</sup> (BDSC #6209), *Su(var)3-9*<sup>2</sup> (BDSC #6210), *smg*<sup>1</sup> (BDSC #5930), *Taf11*<sup>1</sup> (BDSC #65410), *Taf11*<sup>5</sup> (BDSC #65409), *p53*<sup>5A-1-4</sup> (BDSC #6815), *p53*<sup>11-1B-1</sup> (BDSC #6816), *foxo*<sup>Δ94</sup> (BDSC #42220), *PIG-S*<sup>e00272</sup> (BDSC #17833), *bel*<sup>L4740</sup> (BDSC #10222), *bel*<sup>6</sup> (BDSC #4024), *barr*<sup>L305</sup> (BDSC #4402), *SmD1*<sup>EY01516</sup> (BDSC #15514), *vig*<sup>C274</sup> (BDSC #16323), *Ago1*<sup>k08121</sup> (BDSC #10772), *aub*<sup>QC42</sup> (BDSC #4968), *piwi*<sup>06843</sup>

(BDSC #12225), *Su(var)2-10<sup>2</sup>* (BDSC #6235), *egg*<sup>MB00702</sup> (BDSC #22876), *G9a*<sup>MB11975</sup> (BDSC #29933), *P{EPgy2}*<sup>09821</sup> (BDSC #16954), *P{EPgy2}*<sup>15840</sup> (BDSC #21163), and *FLAG.HA.Ago2* (BDSC #33242) were obtained from the Bloomington Drosophila Stock Center. *Ago2*<sup>414</sup> (Kyoto #109027) was obtained from the Kyoto Stock Center. *Su(var)3-7<sup>14</sup>* was a gift from Dr. P. Spierer (SEUM *et al.* 2002). *ocm*<sup>166</sup> was a gift from Dr. R. Kelley. *ΔDsRedΔupSET* (*upSET* in Figure 2) was a gift from Dr. M. Kuroda (McELROY *et al.* 2017). To minimize genetic background effects all mutations were out crossed for five generations using a nearby marked *P*-element (unmarked mutations) or the laboratory reference *yw* strain (mutations marked with *w*<sup>+</sup> or *y*<sup>+</sup>). Stocks were constructed with outcrossed, rebalanced chromosomes and a reference Y-chromosome (MENON AND MELLER 2009). All mutations were confirmed by phenotype or PCR. Mating schemes to determine the effect of Ago2-interactors on dosage compensation are presented in Figure S1. Each test scored about 1000 flies and was performed in triplicate. To express 1.688<sup>3F</sup> siRNA in a *Su(var)3-9<sup>-/-</sup>* mutant background, we generated [*hp1.688<sup>3F</sup>*][*Sqh-Gal4*]/*In(2LR)Gla wg<sup>Gla-1</sup>*; *Su(var)3-9<sup>1</sup>*/ *TM3TbSb* flies and selected non-*Tb* third instar males for ChIP. The [*Sqh-Gal4*] insertion was a gift of Dr. S. Todi. The [*hp1.688<sup>3F</sup>*] transgene contains part of the 1.688<sup>3F</sup> repeat cluster coned in inverted orientation in pWIZ (SIK LEE AND CARTHEW 2003). Although siRNA accumulates to abnormally high levels in larvae expressing [*hp1.688<sup>3F</sup>*], the siRNAs produced appear similar to those isolated from wild type embryos (MENON *et al.* 2014)

## Tissue collection and chromatin preparation

Embryo collection and chromatin preparation was as previously described (KOYA AND MELLER 2015). Briefly, 0.5 g of 0 - 12 hr embryos were collected on molasses plates with yeast. Embryos were dechorionated for 2.5 min in bleach, crosslinked in 50 mM



HEPES, 1 mM EDTA, 0.5 mM EGTA, 100 mM NaCl, 1 % formaldehyde with heptane for 20 min. Crosslinking was quenched with 125 mM glycine, 0.01 % Triton X-100, 1 X PBS for 30 min. Embryos were washed with 10 mM HEPES, 200 mM NaCl, 1 mM EDTA, 0.5 mM EGTA and 0.01 % Triton X-100 and suspended in 2.5 ml of 10 mM HEPES, 1 mM EDTA, 0.5 mM EGTA, 0.1 % Na-deoxycholate and 0.02 % Na-azide for sonication. Sonication, performed on ice at 35 % amplitude, 30 sec on, 59 sec off for a total time 15 min using a Fischer Scientific Model FB505 sonicator, produced 300-600 bp fragments. Chromatin was clarified by centrifuging at 13,000 rpm for 15 min, diluted 1:1 with 2 X RIPA buffer (2 % Triton X-100, 0.2 % Na-deoxycholate, 0.2 % SDS, 280 mM NaCl, 20 mM Tris-HCl pH 8.0, 2 mM EDTA, 0.02 % Na-azide, 2 mM DMSF with complete protease inhibitor (Roche)). Chromatin solution (5.5 ml) was preabsorbed by incubation at 4° for 30 min with 55 µl of blocked Pierce<sup>TM</sup> Protein A agarose beads (Catalog #20333) and aliquots stored at -80°.

For larval chromatin, a modified protocol from (KUZU *et al.* 2016) was used. 150 larvae were frozen in liquid N<sub>2</sub> and ground in a chilled mortar. The powder was transferred to a cooled 15 ml Dounce and homogenized with a loose pestle (10 strokes) and a tight pestle (15 strokes) in 10 ml PBS with protease inhibitor. Homogenate was made to 40 ml with PBS, crosslinked with 1 % formaldehyde for 20 min and quenched with 125 mM glycine for 30 mins. Crosslinked material was pelleted, washed once with wash buffer A (10 mM Hepes pH 7.6, 10 mM EDTA, 0.5 mM EGTA, 0.25 % Triton X-100, protease inhibitor and 0.2 mM PMSF), once with wash buffer B (10 mM Hepes pH 7.6, 100 mM NaCl, 1 mM EDTA, 0.5 mM EGTA, 1 % Triton X-100, protease inhibitor and 0.2 mM PMSF), and 3 times with TE wash buffer (10 mM Tris pH 8.0, 1 mM EDTA, 0.01 %

SDS, protease inhibitor and 0.2 mM PMSF). The pellet was resuspended in 2 ml pre-RIPA buffer (0.1 % SDS, 10 mM Tris-HCl, 1 mM EDTA, protease inhibitor and 0.2 mM PMSF). Sonication was performed at settings described above for 2 min. Sonicated samples were diluted with 1 % Triton X-100, 0.1 % Na-deoxycholate, and 140 mM NaCl, centrifuged at 1500 g to clarify, aliquoted and stored at -80°.

### **Chromatin Immunoprecipitation**

Seventy five micrograms of chromatin was incubated overnight at 4° with 4 µl anti-H3K9me2 (Abcam, ab12220) or 8 µl anti-H3K9me3 (Abcam, ab8898), clarified by centrifugation at 14,000 rpm for 5 min and supernatants transferred to tubes containing 40 µl blocked Pierce<sup>TM</sup> Protein A agarose beads (Catalog #20333) and incubated 4 h at 4°. Following washing, reverse crosslinking, organic extraction and precipitation, DNA was suspended in 50 µl distilled water.

### **ChIP-qPCR**

Duplicate 20 µl reactions consisting of 2 µl DNA, 10 µl BioRad iTaq (#172-5101), and primers were amplified using an Mx3000P Real-Time PCR system (Stratagene). Standard error was derived from the mean Ct values of biological replicates. qPCR analysis was previously described (KOYA AND MELLER 2015). Each ChIP pull down was validated. For H3K9me2, primers in an H3K9me2-enriched region of the 3<sup>rd</sup> chromosome and *dmn* served as positive and negative controls. ChIP primers are presented in Table S1. Primer specificity for 1.688<sup>X</sup> repeats was ensured by anchoring one primer in flanking unique sequence (1.688<sup>1A</sup>, 1.688<sup>3C</sup>, 1.688<sup>4A</sup> and 1.688<sup>7E</sup>) or by designing primers to unique sequences within repeats and testing with genomic DNA

from a strain deleted for the repeat cluster (1.688<sup>3F</sup> and 1.688<sup>7F</sup>; see Menon et al., 2014). Primer efficiencies were determined using MxPro qPCR software. Repeat copy number is normalized by expressing enrichment as percent input.

### **Protein Isolation from embryos**

Fifty mg of 0 - 12 hr embryos were homogenized in 250 µl RIPA buffer on ice. Homogenate was passed through a 26 gauge needle 10 - 12 times to shear DNA. Particulate matter was removed by centrifugation, and supernatant was mixed with an equal volume of 2 X SDS Sample buffer and boiled for 5 min before separation on a 15 % SDS polyacrylamide gel.

### **Protein blotting**

Polyacrylamide gels were equilibrated in transfer buffer (48 mM Tris, 39 mM glycine, 1.3 mM SDS, 20 % methanol) for 20 min. A PVDF membrane was activated in 100 % methanol for 1 min. Filter paper and activated PVDF membranes were saturated in transfer buffer and proteins transferred using a Trans-Blot SD Semi-Dry Transfer Cell (BIO-RAD). The membrane was washed in TBST (10 mM Tris-Cl, 200 mM NaCl, 0.1 % Tween 20, pH 7.5), blocked in 5 % BSA and probed overnight at 4° using 1:2000 mouse anti-H3K9me2 diluted in blocking solution (Abcam, ab1220) or 1:4000 goat anti-tubulin (Developmental Studies Hydrinoma Bank, E7). After washing with TBST, the membrane was incubated with alkaline phosphatase conjugated secondary antibodies (goat anti-mouse, Sigma, A3562 or rabbit anti-goat, Sigma, A4062), washed and developed in 100 mM diethanolamine, 100 mM NaCl, 5 mM MgCl<sub>2</sub>, pH 9.5 containing

33 µg/ml Nitroblue Tetrazolium (NBT) and 165 µg/ml 5-Bromo-4-chloro-3-indolyl phosphate (BCIP). Signals were quantified by ImageJ.

## Quantitative RT-PCR

Total RNA was isolated from 50 third instar male larvae or 100 mg dechorionated embryos using Trizol reagent (Invitrogen) as previously described (KOYA AND MELLER 2015). One microgram of RNA was reverse-transcribed using random hexamers and ImProm-II reverse transcriptase (Promega). Duplicate reactions were amplified using iTaq Universal SYBR Green Supermix (Bio-Rad) with an Mx3000P Real-Time PCR system (Stratagene). Primers are in Table S1. For determining relative transcript abundance, values were normalized to *dmn* (DCTN2-p50). To calculate fold change values were normalized to *dmn* and to a reference strain. Expression was calculated using the efficiency corrected comparative quantification method (PFAFFL 2001).

Strains and materials used in this study are available upon request. The authors affirm that all data necessary to confirm the conclusions of this study are presented within the article, figures and tables.

## Results

### Ago2 localizes at 1.688<sup>x</sup> repeats

We took advantage of the resolution of ChIP and a FLAG-tagged *Ago2* transgene to determine if Ago2 localizes to 1.688<sup>x</sup> repeats. FLAG-Ago2 was first tested for rescue of the dosage compensation function of Ago2. Males with the partial loss of function

*roX1<sup>ex40</sup>roX2Δ* chromosome have high survival, as do *Ago2<sup>-/-</sup>* flies, but synthetic lethality is observed in *roX1<sup>ex40</sup>roX2Δ/Y; Ago2<sup>-/-</sup>* males (MENON AND MELLER 2012). One copy of a FLAG-*Ago2* transgene rescues these males, demonstrating that the FLAG tag does not disrupt the dosage compensation function of *Ago2* (Figure 1A). Chromatin from FLAG-*Ago2*; *Ago2<sup>-/-</sup>* embryos, and from a reference strain lacking the FLAG-*Ago2* transgene, was immunoprecipitated with anti-FLAG antibodies and enrichment determined by quantitative PCR (qPCR). FLAG-*Ago2* was enriched at the *Hsp70* promoter, a site known to bind *Ago2* (CERNIOGAR *et al.* 2011) (Figure 1B). In contrast, a control region in the *dmn* gene displayed no enrichment. We then examined FLAG-*Ago2* enrichment at a panel of six representative 1.688<sup>X</sup> repeat clusters that differ in location and environment (within, near or far from protein coding genes), transcription level and sequence (Table 1). Interestingly, five of these show enrichment of FLAG-*Ago2* over the repeats, but little or no enrichment in flanking regions (Figure 1C). We conclude that *Ago2* localizes at many 1.688<sup>X</sup> repeats, a finding that is consistent with involvement of *Ago2* in siRNA-directed recruitment of chromatin modification at or around these regions.

### **Genetic interactions identify an *Ago2*-interaction network that participates in dosage compensation.**

Argonaute proteins in the RNA Induced Transcriptional Silencing (RITS) complexes of *S. pombe* and plants recruit chromatin modifiers to nascent transcripts (reviewed in (MELLER *et al.* 2015)). To explore the possibility of *Ago2*-interacting proteins participating in X chromosome recognition, we screened genes in an *Ago2*-interaction network for genetic interaction with *roX1 roX2*. A map of high probability *Ago2*-

interactors was created using BioGRID (STARK *et al.* 2006), and esyN (BEAN *et al.* 2014) (Figure 2A; see File S2 for inclusion criteria). Members of this network were examined for genetic interactions with the partial loss of function *roX1<sup>ex33</sup>roX2Δ* X chromosome. *roX1<sup>ex33</sup>roX2Δ* males display partial mislocalization of MSL proteins and eclose at 20 % of normal levels (DENG *et al.* 2005b). Reduction of proteins that participate in X recognition further disrupts X localization and enhances *roX1<sup>ex33</sup>roX2Δ* male lethality (MENON AND MELLER 2012). Females are fully viable and fertile when the *roX* genes are mutated. *roX1<sup>ex33</sup>roX2Δ* females were mated to males that were heterozygous for a mutation in the gene being tested (Figure S1A). All sons are *roX1<sup>ex33</sup>roX2Δ/Y*, and heterozygous (experimental) or wild type (control) for the gene of interest. A reduction in normalized survival (experimental /control) reveals enhancement of *roX1 roX2* male lethality (Figure 2B, C). Daughters, which do not dosage compensate and are heterozygous for *roX1<sup>ex33</sup>roX2Δ*, do not display altered survival upon mutation of Ago2-interacting genes. As *G9a* is located on the X chromosome, a modified strategy to test this gene is presented in Figure S1B.

Normalized survival of *roX1<sup>ex33</sup>roX2Δ* males with mutations in the Ago2-interaction network is presented in Figure 2B. Genes displaying significant interactions are noted by pink symbols, and those showing no interaction are blue in Figure 2A. We confirmed a previously identified siRNA-processing sub-network containing *Dcr2*, *Elp1*, and *loqs* (Figure 2A, dotted line; (MENON AND MELLER 2012)). The present study identified several additional Ago2-interactors, including a potential chromatin-modifying sub-network containing *Dcr1*, *Fmr1*, *Rm62*, and the histone methyltransferase *Su(var)3-9*

(green, Figure 2A). *Su(var)3-9* deposits H3K9me2 and acts with *Rm62* to re-silence active chromatin (BOEKE *et al.* 2011).

Additional chromatin modifiers and genes in other small RNA pathways were also tested (Figure 2C). A previous study found no interaction between *roX1<sup>ex33</sup>roX2Δ* and the piRNA pathway genes *aub* and *piwi*, or the miRNA pathway gene *Ago1*, a finding replicated here (MENON AND MELLER 2012). Since our findings point towards involvement of chromatin modifiers, we tested the chromatin regulatory factor *Su(var)2-10* and two additional H3K9 methyltransferases, *eggless (egg)* and *G9a* (Figure 2C). None of these modified *roX1<sup>ex33</sup>roX2Δ* survival. Mutations in *Su(var)3-7*, important for heterochromatin formation, and *upSET*, which maintains heterochromatin and H3K9me2 levels, enhance *roX1<sup>ex33</sup>roX2Δ* male lethality (SPIERER *et al.* 2008; MCELROY *et al.* 2017). *Over compensating males (ocm)* has an unusual dosage compensation phenotype as mutations in *ocm* rescue males with insufficient MSL activity, suggesting that it might act as a governor of activation (LIM AND KELLEY 2013). Interestingly, mutation of *ocm* significantly increased the survival of *roX1<sup>ex33</sup>roX2Δ* males, supporting the idea that *ocm* normally restrains activation. The P{EPgy2}<sup>09821</sup> and P{EPgy2}<sup>15840</sup> strains, used to outcross *Su(var)3-9* and *barr* mutants, display no interaction and serve as controls for genetic background. Taken together, these findings suggest that several genes that deposit H3K9me2, maintain this mark or participate in heterochromatin formation also contribute to X chromosome dosage compensation. At first glance these observations appear to be at odds with X chromosome hypertranscription, the ultimate consequence of X chromosome recognition.

## Ectopically expressed 1.688<sup>3F</sup> siRNA disrupts H3K9me2 patterns

Previous studies found that ectopically produced 1.688<sup>3F</sup> siRNA partially rescues *roX1* *roX2* males and increases X localization of the MSL complex (MENON *et al.* 2014). The mechanism by which siRNA promotes X recognition is unknown. The discovery that insertion of 1.688<sup>X</sup> DNA on an autosome enables functional compensation of nearby genes, and the enhancement of this effect by ectopic 1.688<sup>3F</sup> siRNA, suggests siRNA action through cognate genomic regions (JOSHI AND MELLER 2017). In accord with this idea, an autosomal *roX1* transgene also enables compensation of nearby genes, but is unaffected by 1.688<sup>3F</sup> siRNA. To test the idea that 1.688<sup>3F</sup> siRNA directs epigenetic modification of 1.688<sup>X</sup> chromatin, we used ChIP to analyze chromatin around 1.688<sup>X</sup> repeats on the X chromosome. ChIP-qPCR detected H3K9me2 enrichment in 4 out of 6 repeats (white bars, Figure 3). As H3K9me2 enrichment was not uniform, we considered additional factors that might determine this mark, and noted that only repeats showing evidence of transcription were enriched for H3K9me2, consistent with the idea of Ago2-dependent recruitment to nascent transcripts (Figure S4) (VERDEL *et al.* 2004). Upon ectopic expression of 1.688<sup>3F</sup> siRNA a dramatic disruption of H3K9me2 was observed in and around 1.688<sup>X</sup> repeats (black bars, Figure 3). For example, 1.688<sup>3F</sup> and 1.688<sup>4A</sup> display peaks of H3K9me2 in wild type flies, but this mark was reduced over the repeats and increased in surrounding regions by elevated 1.688<sup>3F</sup> siRNA. The reduction in H3K9me2 over repeats themselves was unexpected and could represent repositioning of nucleosomes or blocking of the methylated site by another protein. Untranscribed repeat clusters at 1.688<sup>1A</sup> and 1.688<sup>7E</sup> show no H3K9me2 enrichment in wild type flies, but gained H3K9me2 upon expression of 1.688<sup>3F</sup> siRNA. In contrast, no enrichment of H3K9me3 in or near 1.688<sup>X</sup> repeats was detected in wild



type or 1.688<sup>3F</sup> siRNA-expressing embryos (Figure S2). We conclude that some 1.688<sup>X</sup> repeats are enriched for H3K9me2, and that cognate siRNA broadly disrupts this mark within and several kb adjacent to 1.688<sup>X</sup> DNA.

### **Su(var)3-9 deposits H3K9me2 at 1.688<sup>X</sup> repeats**

The identification of Su(var)3-9 as an indirect binding partner of Ago2, observation of a genetic interaction between *roX1 roX2* and *Su(var)3-9* and enrichment of H3K9me2 on some 1.688<sup>X</sup> repeats suggested that Su(var)3-9 could be modifying 1.688<sup>X</sup> repeats. *D. melanogaster* has 3 histone H3K9 methyltransferases, *Su(var)3-9*, *eggless*, and *G9a*, but only *Su(var)3-9* mutations enhance the male lethality of *roX1 roX2* (Figure 2; (SWAMINATHAN *et al.* 2012)). To determine if Su(var)3-9 is responsible for H3K9me2 at 1.688<sup>X</sup> chromatin, we generated strains carrying *Su(var)3-9* over a marked balancer, enabling selection of homozygous *Su(var)3-9* mutant larvae. H3K9me2 enrichment is virtually eliminated over 1.688<sup>X</sup> repeats in *Su(var)3-9<sup>-/-</sup>* mutants (Figure 4, gray) and remains low in *Su(var)3-9<sup>-/-</sup>* larvae that express 1.688<sup>3F</sup> siRNA (Figure 4, black). This reveals that Su(var)3-9 deposits H3K9me2 at 1.688<sup>X</sup> chromatin in wild type flies, and eliminates the possibility that a different methyltransferase is recruited to these regions following ectopic expression of 1.688<sup>3F</sup> siRNA. Disruption of H3K9me2 upon expression of 1.688<sup>3F</sup> siRNA thus reflects changes in the localization or activity of Su(var)3-9.

To determine how far from 1.688<sup>X</sup> repeats the H3K9me2 disruption extends, regions 10 to 26 kb from repeats were examined. In each case, increased H3K9me2 was

observed in embryos with ectopic 1.688<sup>3F</sup> siRNA expression (Figure S3A). This suggested the possibility of a global change in H3K9me2 levels. To address this we probed protein blots from wild type and 1.688<sup>3F</sup> siRNA-expressing embryos to determine global levels of this modification, but found no evidence of a change in H3K9me2 (Figure S3B). As most H3K9me2 is found in heterochromatic regions that comprise > 30 % of the fly genome, changes in euchromatin may represent a negligible portion of the nuclear pool.

H3K9me2 is generally thought to be repressive, but compensation in flies occurs by increased expression of X-linked genes. To determine if changes in H3K9me2 enrichment correlate with changes in transcription, regions flanking 1.688<sup>X</sup> repeats were examined in wild type and 1.688<sup>3F</sup> siRNA-expressing embryos. Consistent with H3K9me2 having a repressive effect, 1.688<sup>3F</sup> siRNA decreases accumulation of mRNA, as well as non-coding intragenic and intronic regions, with elevated H3K9me2 (Figure S4). The apparent increase in 1.688<sup>3F</sup> expression presumably originates from the transgene used to produce ectopic 1.688<sup>3F</sup> siRNA. We detected dramatic reductions in messages immediately adjacent to 1.688<sup>1A</sup> (*tyn*, *G9a*) and 1.688<sup>3F</sup> (*ec*, *roX1*). In spite of a 90 % reduction in *ec* transcript in embryos expressing 1.688<sup>3F</sup> siRNA, adults do not display the rough eye *ec* phenotype. It is possible that ectopic 1.688<sup>3F</sup> siRNA has a more pronounced effect in embryos, whose lack of differentiation may make them particularly susceptible to epigenetic disruption. Mature patterns of chromatin organization are established later in development, and these may be more resilient. To test this, we examined expression in 1.688<sup>3F</sup> siRNA-expressing third instar male larvae, and found that *tyn*, *G9a* and *ec* regained wild type transcript levels, and *roX1* was

largely restored (Figure S4). The precise reason for the differences between embryos and larvae are uncertain, but restoration of normal gene expression by the third larval instar is consistent with the lack of phenotype in otherwise wild type flies that ectopically express 1.688<sup>3F</sup> siRNA (MENON *et al.* 2014).

The finding that animal age influenced response to ectopic siRNA prompted us to determine the time point at which H3K9me2 is established at 1.688<sup>X</sup> repeats. A possible scenario is that this mark is placed before MSL localization, and acts in some way to guide X recognition. X-localization of the MSL complex occurs 3 h after egg laying (AEL) (RASTELLI *et al.* 1995; MELLER 2003). We measured H3K9me2 enrichment at 1.688<sup>3F</sup> in embryos before the MSL complex binds to the X (1.5 - 3 h), during initial MSL recruitment (3 - 4 h), and at 4 - 6 h and 6 -12 h. In contrast to our prediction, H3K9me2 is first detected on 1.688<sup>3F</sup> between 6 and 12 h AEL, after X localization of the MSL complex has occurred (Figure S5). We conclude that H3K9me2 at 1.688<sup>X</sup> repeats is unlikely to guide initial X recognition, but may serve at a later time point to facilitate spreading of this mark or enforce the stability of X recognition. As lethality due to failure of dosage compensation occurs at the end of the 3<sup>rd</sup> instar, rescue of male viability could presumably occur during a window of several days.

### **H3K9me2 is enriched at regions flanking autosomal 1.688<sup>3F</sup> transgenes**

One challenge of studying recruiting elements on the X chromosome is that the redundancy and proximity of these elements complicates interpretation. To overcome this we tested autosomal integrations of 1.688<sup>3F</sup> DNA or *roX1* (Figure 5A) (JOSHI AND MELLER 2017). H3K9me2 ChIP was performed on chromatin from third instar male

larvae with 1.688<sup>3F</sup> (Figure 5B) or *roX1* (Figure 5C) on 2L (gray bars), and in the same genotypes with ectopic expression of 1.688<sup>3F</sup> siRNA (black bars). H3K9me2 within 5 kb of the integration site is not strongly enriched in control males, or in males with a *roX1* transgene, but is strikingly elevated when 1.688<sup>3F</sup> DNA is present. Consistent with our observations in embryos, ectopic 1.688<sup>3F</sup> siRNA further elevated H3K9me2 near the 1.688<sup>3F</sup> integration. This contrasts with negligible enrichment flanking the *roX1* transgene (Figure 5C). For unknown reasons, enrichment over the integrated 1.688<sup>3F</sup> DNA was itself undetectable. We conclude that autosomal insertion of 1.688<sup>3F</sup> DNA makes flanking chromatin subject to siRNA-induced H3K9me2 deposition. Taken together, these studies support the idea that the 1.688<sup>X</sup> repeats influence patterns of H3K9me2 nearby, but CES-containing *roX1*, with a different class of recruiting element, has little effect.

To determine the influence of 1.688<sup>3F</sup> and *roX1* on transcription of autosomal genes on 2L, we performed quantitative RT-PCR (qRT PCR) on total RNA from third instar male larvae of the genotypes described above. The 1.688<sup>3F</sup> and *roX1* integration site is in an intron of *haf*, over 17 kb from the closest exon. We also examined *RFeSP*, *CG33128*, *Eno* (30, 89 and 142 kb from the insertion, respectively), and *CG31778* and *Rpl37A*, 2.1 and 3.5 Mb distant (Figure 5D). The presence of 1.688<sup>3F</sup> or *roX1* integrations alone had no effect on the most distant genes, *CG31778* and *Rpl37A*. A *roX1* integration increased expression of *haf* 2.5 fold, more than expected from full compensation. This may reflect the fact that MSL recruitment to a *roX1* transgene can overcome local, chromatin-based silencing (KELLEY AND KURODA 2003). Addition of 1.688<sup>3F</sup> siRNA

increased *haf* expression slightly, and similarly increased expression of *CG33128* and *Eno* (light gray bars, Figure 5E).

A 1.688<sup>3F</sup> insertion produced a four-fold increase in *haf*, and a slight increase in *Eno*, 141 kb from the integration site. But upon expression of 1.688<sup>3F</sup> siRNA, *haf* expression increased to 8 fold wild type levels, and *CG33128* and *Eno* both increased to 2-fold wild type levels, consistent with full compensation. We conclude that an autosomal insertion of 1.688<sup>X</sup> DNA induces H3K9me2 deposition on flanking chromatin, but also increases expression of genes on 2L in a manner that is consistent with recruitment of the MSL complex. Both H3K9me2 enrichment and increased expression is enhanced by 1.688<sup>3F</sup> siRNA, suggesting that X identification involves an siRNA-directed mechanism that operates through 1.688<sup>X</sup> repeats.

## Discussion

Molecularly distinct dosage compensation strategies have arisen independently in different organisms, but a shared feature is the ability to selectively recognize and alter an entire chromosome. How a regulatory system is directed to a single chromosome is poorly understood. The discovery that 1.688<sup>X</sup> satellite DNA promotes recruitment of dosage compensation to nearby genes supports the idea that these repeats are important for selective recognition of X chromatin (JOSHI AND MELLER 2017). How the 1.688<sup>X</sup> repeats accomplish this is a question of great interest. Involvement of the siRNA pathway, and siRNA from a 1.688<sup>X</sup> repeat, in X recognition points to the possibility that siRNA-directed modification of chromatin around 1.688<sup>X</sup> repeats plays a role in dosage compensation in normal males. The findings of the current study support this idea.

Although numerous studies point to small RNA regulation of chromatin in flies, this process is better understood in other organisms (reviewed in (MELLER *et al.* 2015)). Small RNA directed heterochromatin formation was discovered in *S. pombe* (reviewed in (MOAZED 2009)). Heterochromatic regions are transcribed during S phase, and transcripts are processed into siRNAs that guide the Ago1-containing RITS complex to complementary, nascent transcripts (VERDEL *et al.* 2004). In addition to several other activities, RITS recruits the H3K9 methyltransferase Clr4 (ZHANG *et al.* 2008). We propose that a similar process is occurring at 1.688<sup>X</sup> chromatin in flies. Most 1.688<sup>X</sup> repeats bind Ago2, and many are transcribed. Several of the 1.688<sup>X</sup> repeats that we examined are enriched for H3K9me2 deposited by Su(var)3-9, an ortholog of Clr4. Our screen identified genetic interactions between *roX1 roX2* and members of a possible RITS-like complex consisting of Ago2, Rm62 and Su(var)3-9. Finally, H3K9me2 enrichment in, and around, 1.688<sup>X</sup> repeats is responsive to 1.688<sup>X</sup> siRNA, and enrichment is blocked by loss of Su(var)3-9. Taken together, these findings suggest that a RITS-like complex normally modifies chromatin at 1.688<sup>X</sup> repeats.

The idea that repressive H3K9me2 marks participate in a process culminating in a two-fold increase in expression is counterintuitive, but X recognition is complex. This process involves CES sites that directly recruit the MSL complex and the 1.688<sup>X</sup> repeats, acting indirectly to enhance X recognition (Figure 6). It is possible that X recognition uses epigenetic marks, such as H3K9me2, that are distinct from the activating marks deposited within genes by the MSL complex. We propose that robust X recognition results from cooperation between two distinct pathways that guide this

process. Interestingly, numerous studies have discovered links between the compensated X chromosome of male flies and repressive marks. For example, the male X is enriched in HP1, a major constituent of heterochromatin that binds H3K9me2 (DE WIT *et al.* 2005; LIU *et al.* 2005). The structure of the polytenized male X chromosome is extraordinarily sensitive to altered levels of genes that participate in heterochromatin formation or silencing, such as *HP1*, *Su(var)3-7* and *ISWI*. Mutations in these genes produce a general disruption of polytenization that is strikingly specific to the male X (DEURING *et al.* 2000; SPIERER *et al.* 2005; ZHANG *et al.* 2006). JIL-1, a kinase that enforces boundaries between heterochromatin and euchromatin, is enriched on the X chromosome and thought to participate in compensation (JIN *et al.* 2000; WANG *et al.* 2001; EBERT *et al.* 2004; DENG *et al.* 2005a). Upon loss of JIL-1, polytenized structure is disrupted and H3K9me2 invades euchromatic chromosome arms, but the X chromosome is most severely affected (ZHANG *et al.* 2006). Finally, the MSL proteins themselves have an affinity for heterochromatin. In *roX1 roX2* mutant males the MSL proteins become mislocalized to ectopic autosomal sites (MELLER AND RATTNER 2002). For reasons that are still unclear, the most prominent of these sites are the heterochromatic 4<sup>th</sup> chromosome and chromocenter (DENG AND MELLER 2006; FIGUEIREDO *et al.* 2014). Taken together, these observations suggest that X recognition, or spreading of the MSL complex, could be facilitated by repressive marks. One intriguing possibility is that 1.688<sup>X</sup> repeats guide deposition of H3K9me2 and this mark, directly or indirectly, assists localization of the MSL complex. Although MSL-mediated compensation initiates at 3 h AEL, before H3K9me2 enrichment over 1.688<sup>X</sup> chromatin, male killing due to loss or mislocalization of the MSL complex occurs several days later at the larval/pupal transition. It is possible that ectopic production of 1.688<sup>X</sup> siRNA

drives enrichment of H3K9me2 across the X, supporting X recognition or MSL complex spreading at later developmental stages. This would explain why *roX1 roX2* mutant male larvae, defective for X recognition, display increased X-localization of the MSL proteins and elevated viability upon expression of 1.688<sup>X</sup> siRNA (MENON *et al.* 2014).

An intriguing aspect of dosage compensation is the evolutionary convergence of mechanisms. For example, long non-coding RNA also plays a central role in X recognition in mammals, where expression of the *X inactive specific transcript (Xist)* RNA guides X inactivation (LEE 2009). Furthermore, repetitive LINE-1 elements that are enriched on the mammalian X chromosome are proposed to facilitate X inactivation (LYON 1998; BAILEY *et al.* 2000). Interestingly, some LINE-1 elements are transcribed during the onset of X inactivation, producing endo-siRNAs that may guide local spreading of heterochromatin into regions that are otherwise prone to escape (CHOW *et al.* 2010). These parallels are particularly striking as the outcomes, silencing of an X chromosome in mammalian females and activation of the single X in male flies, appear unrelated. We propose that cooperation between distinct chromatin-modifying systems that rely on long and short non-coding RNAs is one strategy to selectively modulate an entire chromosome.

## Acknowledgments

The authors wish to thank colleagues who donated fly strains, Drs. S. Todi, M. Kuroda, R. Kelley and P. Spierer. We thank Drs. S. K. Koya and E. Larschan for advice on ChIP. Stocks obtained from the Bloomington Drosophila Stock Center (NIH P40OD018537) and the Kyoto Stock Center were used in this study. N. D. was



supported in part by a Summer Dissertation Fellowship and a Graduate Enhancement award. This work was supported by NIH grant GM 093110 to V.H.M.

## References

- Akhtar, A., and P. B. Becker, 2000 Activation of transcription through histone H4 acetylation by MOF, an acetyltransferase essential for dosage compensation in *Drosophila*. *Mol Cell* 5: 367-375.
- Alekseyenko, A. A., S. Peng, E. Larschan, A. A. Gorchakov, O. K. Lee *et al.*, 2008 A sequence motif within chromatin entry sites directs MSL establishment on the *Drosophila* X chromosome. *Cell* 134: 599-609.
- Bailey, J. A., L. Carrel, A. Chakravarti and E. E. Eichler, 2000 Molecular evidence for a relationship between LINE-1 elements and X chromosome inactivation: The Lyon repeat hypothesis. *PNAS* 97: 6634-6639.
- Bean, D. M., J. Heimbach, L. Ficorella, G. Micklem, S. G. Oliver *et al.*, 2014 esyN: network building, sharing and publishing. *PLoS One* 9: e106035.
- Boeke, J., I. Bag, M. J. Ramaiah, I. Vetter, E. Kremmer *et al.*, 2011 The RNA helicase Rm62 cooperates with SU(VAR)3-9 to re-silence active transcription in *Drosophila melanogaster*. *PLoS One* 6: e20761.
- Cernilogar, F. M., M. C. Onorati, G. O. Kothe, A. M. Burroughs, K. M. Parsi *et al.*, 2011 Chromatin-associated RNA interference components contribute to transcriptional regulation in *Drosophila*. *Nature* 480: 391-395.
- Chow, J. C., C. Ciaudo, M. J. Fazzari, N. Mise, N. Servant *et al.*, 2010 LINE-1 Activity in Facultative Heterochromatin Formation during X Chromosome Inactivation. *Cell* 141: 956-969.
- de Wit, E., F. Greil and B. van Steensel, 2005 Genome-wide HP1 binding in *Drosophila*: developmental plasticity and genomic targeting signals. *Genome Res* 15: 1265-1273.
- Deng, H., W. Zhang, X. Bao, J. N. Martin, J. Girton *et al.*, 2005a The JIL-1 kinase regulates the structure of *Drosophila* polytene chromosomes. *Chromosoma* 114: 173-182.
- Deng, X., and V. H. Meller, 2006 roX RNAs are required for increased expression of X-linked genes in *Drosophila melanogaster* males. *Genetics* 174: 1859-1866.

- Deng, X., B. P. Rattner, S. Souter and V. H. Meller, 2005b The severity of roX1 mutations is predicted by MSL localization on the X chromosome. *Mech Dev* 122: 1094-1105.
- Deuring, R., L. Fanti, J. A. Armstrong, M. Sarte, O. Papoulas *et al.*, 2000 The ISWI chromatin-remodeling protein is required for gene expression and the maintenance of higher order chromatin structure in vivo. *Mol Cell* 5: 355-365.
- DiBartolomeis, S. M., K. D. Tartof and F. R. Jackson, 1992 A superfamily of Drosophila satellite related (SR) DNA repeats restricted to the X chromosome euchromatin. *Nucleic Acids Res* 20: 1113-1116.
- Ebert, A., G. Schotta, S. Lein, S. Kubicek, V. Krauss *et al.*, 2004 Su(var) genes regulate the balance between euchromatin and heterochromatin in Drosophila. *Genes & Development* 18: 2973-2983.
- Figueiredo, M. L., M. Kim, P. Philip, A. Allgardsson, P. Stenberg *et al.*, 2014 Non-coding roX RNAs prevent the binding of the MSL-complex to heterochromatic regions. *PLoS Genet* 10: e1004865.
- Gallach, M., 2014 Recurrent turnover of chromosome-specific satellites in Drosophila. *Genome Biol Evol* 6: 1279-1286.
- Gelbart, M. E., and M. I. Kuroda, 2009 Drosophila dosage compensation: a complex voyage to the X chromosome. *Development* 136: 1399-1410.
- Hsieh, T., and D. Brutlag, 1979 Sequence and sequence variation within the 1.688 g/cm<sup>3</sup> satellite DNA of Drosophila melanogaster. *J Mol Biol* 135: 465-481.
- Jin, Y., Y. Wang, J. Johansen and K. M. Johansen, 2000 JIL-1, a chromosomal kinase implicated in regulation of chromatin structure, associates with the male specific lethal (MSL) dosage compensation complex. *J Cell Biol* 149: 1005-1010.
- Joshi, S. S., and V. H. Meller, 2017 Satellite Repeats Identify X Chromatin for Dosage Compensation in Drosophila melanogaster Males. *Curr Biol* 27: 1393-1402
- Kelley, R. L., and M. I. Kuroda, 2003 The Drosophila roX1 RNA gene can overcome silent chromatin by recruiting the male-specific lethal dosage compensation complex. *Genetics* 164: 565-574.
- Kelley, R. L., V. H. Meller, P. R. Gordadze, G. Roman, R. L. Davis *et al.*, 1999 Epigenetic spreading of the Drosophila dosage compensation complex from roX RNA genes into flanking chromatin. *Cell* 98: 513-522.

- Kind, J., and A. Akhtar, 2007 Cotranscriptional recruitment of the dosage compensation complex to X-linked target genes. *Genes Dev* 21: 2030-2040.
- Koya, S. K., and V. H. Meller, 2011 roX RNAs and Genome Regulation in *Drosophila Melanogaster*. *Prog Mol Subcell Biol* 51: 147-160.
- Koya, S. K., and V. H. Meller, 2015 Modulation of Heterochromatin by Male Specific Lethal Proteins and roX RNA in *Drosophila melanogaster* Males. *PLoS One* 10: e0140259.
- Kuhn, G. C., H. Kuttler, O. Moreira-Filho and J. S. Heslop-Harrison, 2012 The 1.688 repetitive DNA of *Drosophila*: concerted evolution at different genomic scales and association with genes. *Mol Biol Evol* 29: 7-11.
- Kuzu, G., E. G. Kaye, J. Chery, T. Siggers, L. Yang *et al.*, 2016 Expansion of GA Dinucleotide Repeats Increases the Density of CLAMP Binding Sites on the X-Chromosome to Promote *Drosophila* Dosage Compensation. *PLoS Genet* 12: e1006120.
- Larschan, E., A. A. Alekseyenko, A. A. Gortchakov, S. Peng, B. Li *et al.*, 2007 MSL complex is attracted to genes marked by H3K36 trimethylation using a sequence-independent mechanism. *Mol Cell* 28: 121-133.
- Larschan, E., E. P. Bishop, P. V. Kharchenko, L. J. Core, J. T. Lis *et al.*, 2011 X chromosome dosage compensation via enhanced transcriptional elongation in *Drosophila*. *Nature* 471: 115-118.
- Lee, J. T., 2009 Lessons from X-chromosome inactivation: long ncRNA as guides and tethers to the epigenome. *Genes Dev* 23: 1831-1842.
- Lim, C. K., and R. L. Kelley, 2013 The *Drosophila* over compensating males gene genetically inhibits dosage compensation in males. *PLoS One* 8: e60450.
- Liu, L. P., J. Q. Ni, Y. D. Shi, E. J. Oakeley and F. L. Sun, 2005 Sex-specific role of *Drosophila melanogaster* HP1 in regulating chromatin structure and gene transcription. *Nat Genet* 37: 1361-1366.
- Lucchesi, J. C., W. G. Kelly and B. Panning, 2005 Chromatin remodeling in dosage compensation. *Annu Rev Genet* 39: 615-651.
- Lucchesi, J. C., and M. I. Kuroda, 2015 Dosage compensation in *Drosophila*. *Cold Spring Harb Perspect Biol* 7.

- Lyon, M. F., 1998 X-chromosome inactivation: a repeat hypothesis. *Cytogenet Cell Genet* 80: 133-137.
- McElroy, K. A., Y. L. Jung, B. M. Zee, C. I. Wang, P. J. Park *et al.*, 2017 upSET, the *Drosophila* homologue of SET3, Is Required for Viability and the Proper Balance of Active and Repressive Chromatin Marks. *G3 (Bethesda)* 7: 625-635.
- Meller, V. H., 2003 Initiation of dosage compensation in *Drosophila* embryos depends on expression of the roX RNAs. *Mech Dev* 120: 759-767.
- Meller, V. H., S. S. Joshi and N. Deshpande, 2015 Modulation of Chromatin by Noncoding RNA. *Annu Rev Genet* 49: 673-695.
- Meller, V. H., and B. P. Rattner, 2002 The roX genes encode redundant male-specific lethal transcripts required for targeting of the MSL complex. *EMBO J* 21: 1084-1091.
- Menon, D. U., C. Coarfa, W. Xiao, P. H. Gunaratne and V. H. Meller, 2014 siRNAs from an X-linked satellite repeat promote X-chromosome recognition in *Drosophila melanogaster*. *Proc Natl Acad Sci U S A* 111: 16460-16465.
- Menon, D. U., and V. H. Meller, 2009 Imprinting of the Y Chromosome Influences Dosage Compensation in roX1 roX2 *Drosophila melanogaster*. *Genetics* 183: 811.
- Menon, D. U., and V. H. Meller, 2012 A role for siRNA in X-chromosome dosage compensation in *Drosophila melanogaster*. *Genetics* 191: 1023-1028.
- Moazed, D., 2009 Small RNAs in transcriptional gene silencing and genome defence. *Nature* 457: 413-420.
- Monfort, M., E. E. M. Furlong and C. Girardot, 2017 Dynamix: dynamic visualization by automatic selection of informative tracks from hundreds of genomic datasets. *Bioinformatics* 33: 2194-2196.
- Pfaffl, M. W., 2001 A new mathematical model for relative quantification in real-time RT-PCR. *Nucleic Acids Res* 29: e45.
- Quinn, J. J., I. A. Ilik, K. Qu, P. Georgiev, C. Chu *et al.*, 2014 Revealing long noncoding RNA architecture and functions using domain-specific chromatin isolation by RNA purification. *Nat Biotechnol* 32: 933-940.

- Rastelli, L., R. Richman and M. I. Kuroda, 1995 The dosage compensation regulators MLE, MSL-1 and MSL-2 are interdependent since early embryogenesis in *Drosophila*. *Mech Dev* 53: 223-233.
- Seum, C., D. Pauli, M. Delattre, Y. Jaquet, A. Spierer *et al.*, 2002 Isolation of Su(var)3-7 mutations by homologous recombination in *Drosophila melanogaster*. *Genetics* 161: 1125-1136.
- Shogren-Knaak, M., H. Ishii, J. M. Sun, M. J. Pazin, J. R. Davie *et al.*, 2006 Histone H4-K16 acetylation controls chromatin structure and protein interactions. *Science* 311: 844-847.
- Sik Lee, Y., and R. W. Carthew, 2003 Making a better RNAi vector for *Drosophila*: use of intron spacers. *Methods* 30: 322-329.
- Smith, E. R., A. Pannuti, W. Gu, A. Steurnagel, R. G. Cook *et al.*, 2000 The *Drosophila* MSL complex acetylates histone H4 at lysine 16, a chromatin modification linked to dosage compensation. *Mol Cell Biol* 20: 312-318.
- Soruco, M. M., J. Chery, E. P. Bishop, T. Siggers, M. Y. Tolstorukov *et al.*, 2013 The CLAMP protein links the MSL complex to the X chromosome during *Drosophila* dosage compensation. *Genes Dev* 27: 1551-1556.
- Spierer, A., F. Begeot, P. Spierer and M. Delattre, 2008 SU(VAR)3-7 links heterochromatin and dosage compensation in *Drosophila*. *PLoS Genet* 4: e1000066.
- Spierer, A., C. Seum, M. Delattre and P. Spierer, 2005 Loss of the modifiers of variegation Su(var)3-7 or HP1 impacts male X polytene chromosome morphology and dosage compensation. *J Cell Sci* 118: 5047.
- Stark, C., B. J. Breitkreutz, T. Reguly, L. Boucher, A. Breitkreutz *et al.*, 2006 BioGRID: a general repository for interaction datasets. *Nucleic Acids Res* 34: D535-539.
- Straub, T., C. Grimaud, G. D. Gilfillan, A. Mitterweger and P. B. Becker, 2008 The chromosomal high-affinity binding sites for the *Drosophila* dosage compensation complex. *PLoS Genet* 4: e1000302.
- Sural, T. H., S. Peng, B. Li, J. L. Workman, P. J. Park *et al.*, 2008 The MSL3 chromodomain directs a key targeting step for dosage compensation of the *Drosophila melanogaster* X chromosome. *Nat Struct Mol Biol* 15: 1318-1325.

- Swaminathan, A., A. Gajan and L. A. Pile, 2012 Epigenetic regulation of transcription in *Drosophila*. *Front Biosci (Landmark Ed)* 17: 909-937.
- Verdel, A., S. Jia, S. Gerber, T. Sugiyama, S. Gygi *et al.*, 2004 RNAi-mediated targeting of heterochromatin by the RITS complex. *Science* 303: 672-676.
- Wang, Y., W. Zhang, Y. Jin, J. Johansen and K. M. Johansen, 2001 The JIL-1 tandem kinase mediates histone H3 phosphorylation and is required for maintenance of chromatin structure in *Drosophila*. *Cell* 105: 433-443.
- Waring, G. L., and J. C. Pollack, 1987 Cloning and characterization of a dispersed, multicopy, X chromosome sequence in *Drosophila melanogaster*. *PNAS* 84: 2843-2847.
- Zhang, K., K. Mosch, W. Fischle and S. I. Grewal, 2008 Roles of the Clr4 methyltransferase complex in nucleation, spreading and maintenance of heterochromatin. *Nat Struct Mol Biol* 15: 381-388.
- Zhang, W., H. Deng, X. Bao, S. Lerach, J. Girton *et al.*, 2006 The JIL-1 histone H3S10 kinase regulates dimethyl H3K9 modifications and heterochromatic spreading in *Drosophila*. *Development* 133: 229-235.

**Table I. Panel of 1.688<sup>X</sup> repeats used in this study.**

| Repeat               |                                      | 1.688 <sup>1A</sup>                      | 1.688 <sup>3C</sup>      | 1.688 <sup>3F</sup>      | 1.688 <sup>4A</sup>      | 1.688 <sup>7E</sup>      | 1.688 <sup>7F</sup>      |
|----------------------|--------------------------------------|------------------------------------------|--------------------------|--------------------------|--------------------------|--------------------------|--------------------------|
| Cytological position |                                      | 1A1                                      | 3B5                      | 3F3                      | 4A4                      | 7E5                      | 7F3                      |
|                      | Scaffold coordinates on X            | 204,046..<br>241,257                     | 2,768,669..<br>2,770,136 | 3,857,647..<br>3,858,186 | 4,070,631..<br>4,071,316 | 8,369,270..<br>8,369,783 | 8,530,749..<br>8,531,260 |
|                      |                                      |                                          |                          |                          |                          |                          |                          |
| Copy number          | Genomic Scaffold                     | 98                                       | 3                        | 2.5                      | 2                        | 1.5                      | 1.5                      |
|                      | Lab reference                        | -                                        | 3.5                      | 3.5                      | 2.5                      | 2.5                      | 1.5                      |
| Repeat properties    | Percent match to 1.688 <sup>3F</sup> | 89                                       | 69                       | 100                      | 95                       | 71                       | 69                       |
|                      | Genomic environment                  | 37kb of repeats between convergent genes | Intronic                 | Between convergent genes | Isolated                 | Isolated                 | Intronic                 |
| Transcription        | EST abundance                        | 0                                        | 2                        | 9                        | 2                        | 0                        | 26                       |
|                      | qRT PCR <sup>a</sup>                 | 0.00026                                  | 0.01                     | 0.3                      | 0.1                      | 0.04                     | 1.5                      |
|                      | RNA polII enrichment                 | -                                        | -                        | +                        | -                        | -                        | -                        |

**Table I. Panel of 1.688<sup>X</sup> repeats used in this study.** Cytological positions and scaffold coordinates were determined from Flybase (Release 6). The copy number at some positions differed between the laboratory reference strain and the genomic scaffold (see File S1). Similarity to 1.688<sup>3F</sup> was determined by BLAST alignment of a 359 bp monomer. EST abundance is estimated from Flybase assignments. RNA polII enrichment is derived from ChIP-seq of 6-8 h mesoderm (MONFORT *et al.* 2017).

<sup>a</sup> Quantitative RT-PCR (qRT PCR) is normalized to repeat copy number (see Figure S4).



## Figure Legends

### Figure 1. FLAG-Ago2 rescues the Ago2 dosage compensation function and

**localizes at 1.688<sup>X</sup> repeats.** (A) A FLAG-Ago2 transgene (right) rescues the synthetic lethality of *roX1<sup>ex40</sup> roX2Δ/Y; Ago2<sup>414/414</sup>* males (center). (B) Chromatin from the laboratory reference strain (white) and *Ago2<sup>414/414</sup>*; FLAG-Ago2 (black) embryos was precipitated with anti-FLAG antibody. Enrichment normalized to input is shown. The *Hsp70* promoter displays enrichment, but a control region in *dmn* does not. (C) FLAG-Ago2 enrichment is detected at several 1.688<sup>X</sup> repeats (gray arrowheads).

Approximately 100 copies of the 1.688<sup>1A</sup> repeats are situated between *tyn* and CG3038. The 1.688<sup>3C</sup> repeats are within a large *kirre* intron (splicing indicated by diagonal lines). Primers, indexed by gene and amplicon number, are presented in Table S1. Amplicon numbers, constant throughout this study, denote regions in selected repeats and flanking regions as indicated on gene models. In panel C only two amplicons per repeat, one including the repeats and in an adjacent region, were analyzed.

### Figure 2. Ago2-interactors participate in dosage compensation. (A) Map of Ago2-

interacting proteins. Genes displaying a genetic interaction with *roX1<sup>ex33</sup> roX2Δ* are pink, and those for which a significant interaction has not been detected are blue. Genes in gray are untested. A previously reported siRNA-producing sub-network is denoted by the dotted line. A putative chromatin-modifying sub-network identified in the present study is highlighted in green. Well-curated, high probability interactions from BioGRID and esyN are depicted by solid lines. See File S2 for inclusion criteria. (B) Mutations in many Ago2-interacting proteins reduce the recovery of *roX1<sup>ex33</sup> roX2Δ*

males (black;  $roX1^{ex33}roX2\Delta/Y$ ;  $mut/+$  normalized to  $roX1^{ex33}roX2\Delta/Y$ ;  $+/+$ ). Females are unaffected (white;  $roX1^{ex33}roX2\Delta/++$ ;  $mut/+$  normalized to  $roX1^{ex33}roX2\Delta/++$ ;  $+/+$ ). (C) Additional controls and genes of interest. The mating strategy to test X-linked G9a is presented in Figure S1B. See Materials and Methods for *upSET* description. SEM is represented by error bars. Significance of  $\leq 0.05$  (\*) and  $\leq 0.001$  (\*\*) was determined using the Student's two sample *t*-test.

**Figure 3. Elevated 1.688<sup>3F</sup> siRNA disrupts H3K9me2 enrichment around 1.688<sup>X</sup> repeats.** Chromatin from wild type embryos (white) and embryos ectopically producing 1.688<sup>3F</sup> siRNA (black) was immunoprecipitated with antibody to H3K9me2. Enrichment over input was determined by quantitative PCR (qPCR). The standard error of two biological replicates is shown. Amplicons correspond to numbered positions on the gene models above. Primers are presented in Table S1.

**Figure 4. Su(var)3-9 deposits H3K9me2 at 1.688<sup>X</sup> repeats.** Chromatin from wild type male larvae (white), *Su(var)3-9<sup>1</sup>/Su(var)3-9<sup>1</sup>* male larvae (gray), and *Su(var)3-9<sup>1</sup>/Su(var)3-9<sup>1</sup>* males ectopically expressing 1.688<sup>3F</sup> siRNA (black) was immunoprecipitated with antibody to H3K9me2. Enrichment normalized to input is shown. Standard error is derived from two biological replicates. See materials and methods for full genotypes and larval selection strategy.

## Figure 5. Ectopic 1.688<sup>3F</sup> siRNA increases H3K9me2 flanking an autosomal

**1.688<sup>3F</sup> DNA insertion and elevates expression of nearby genes.** (A) Amplicons flanking the landing site in a large *haf* intron at 22A3 (splicing not shown). (B) H3K9me2 enrichment surrounding the 1.688<sup>3F</sup> transgene. Chromatin from wild type third instar male larvae (white), larvae with 1.688<sup>3F</sup> DNA at the landing site (gray), and larvae with 1.688<sup>3F</sup> DNA at the landing site and ectopic 1.688<sup>3F</sup> siRNA (black) was immunoprecipitated with antibody to H3K9me2. (C) H3K9me2 enrichment surrounding a *roX1* insertion. Chromatin from wild type male third instar larvae (white), larvae with the *roX1* insertion (gray), and with the *roX1* insertion and ectopic 1.688<sup>3F</sup> siRNA (black) was immunoprecipitated. Data is from two biological replicates and enrichment is normalized to input. (D) Portion of 2L showing relative location of *CG33128*, *haf*, *RFeSP*, *Eno*, *CG31778*, and *Rpl37A*. (E) Accumulation of transcripts in male larvae carrying *roX1* (white) or 1.688<sup>3F</sup> insertions (dark gray), and in male larvae that express ectopic 1.688<sup>3F</sup> siRNA and have *roX1* (light gray) or 1.688<sup>3F</sup> integrations (black). Expression is normalized to *dmn* and wild type male larvae. SEM is derived from three biological replicates. Significance was determined using Student's two sample *t*-test,  $\leq 0.05$  (\*),  $\leq 0.001$  (\*\*) significance. Primers are presented in Table S1.

**Figure 6. Proposed model of cooperative X recognition.** The MSL complex is directly recruited to CES and then spreads into active genes nearby (right). 1.688<sup>X</sup> siRNA guides an Ago2-containing complex that modifies chromatin around 1.688<sup>X</sup> DNA, possibly in a transcription-dependent manner (left). We postulate that robust X recognition involves the cooperative action of both pathways.

Figure 1

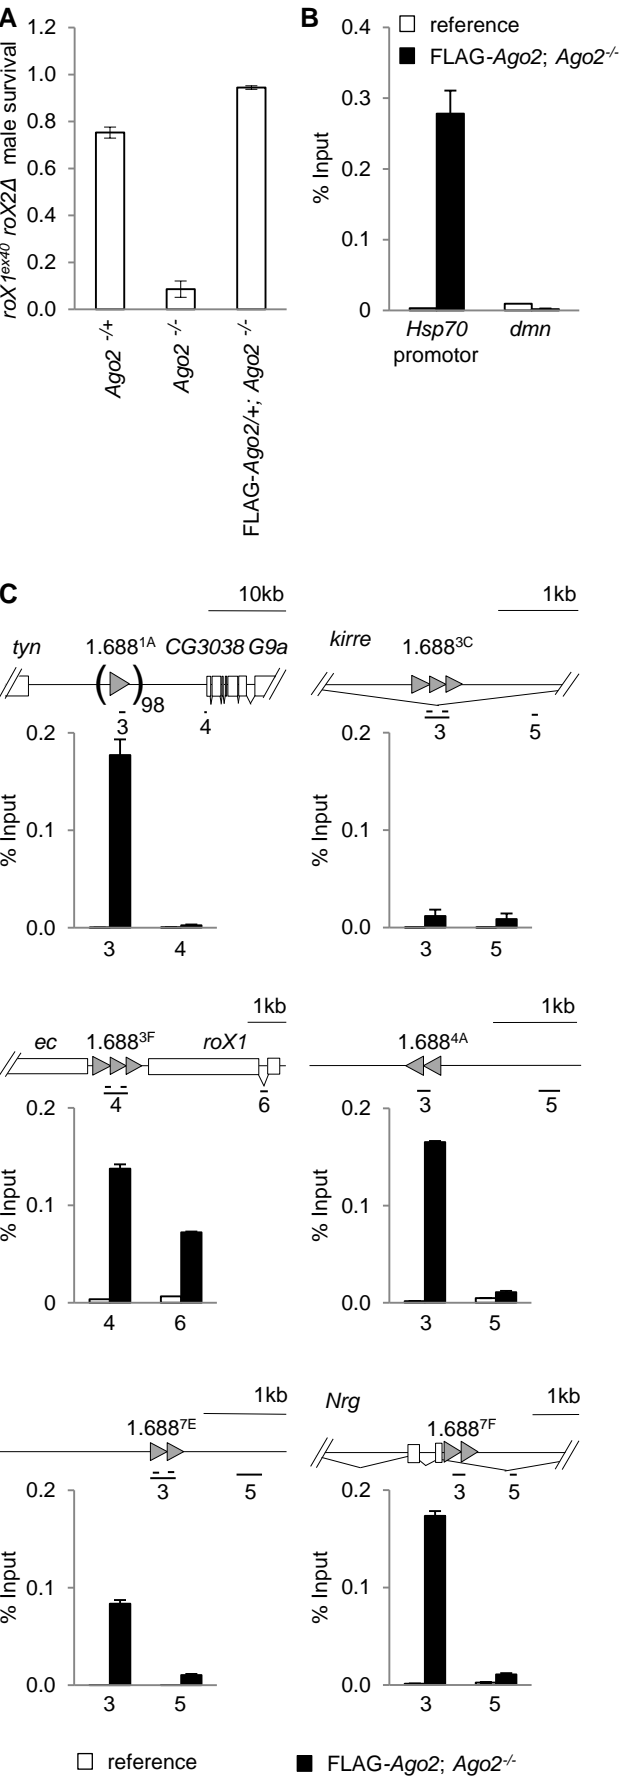

Figure 2

A

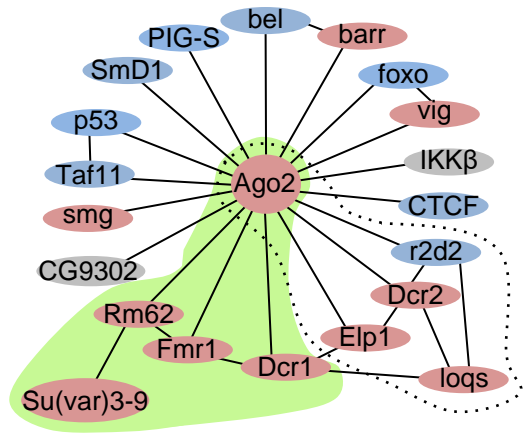

B

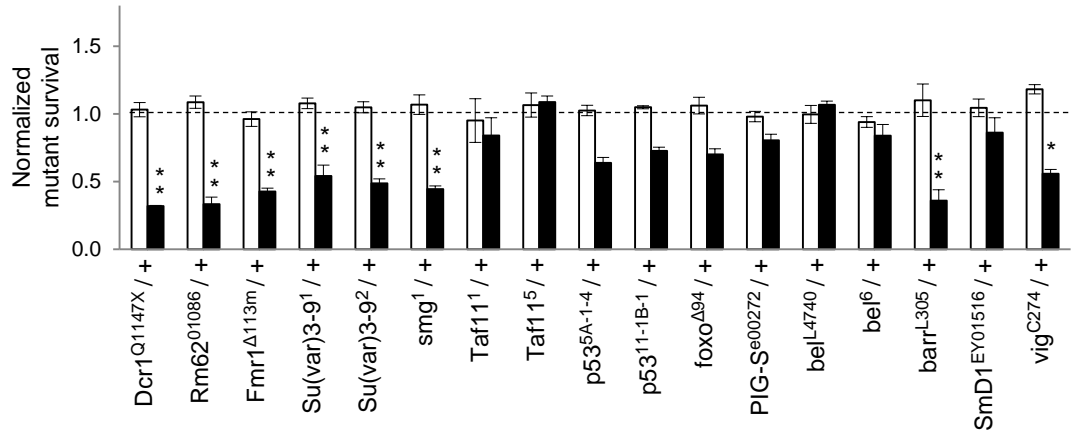

C

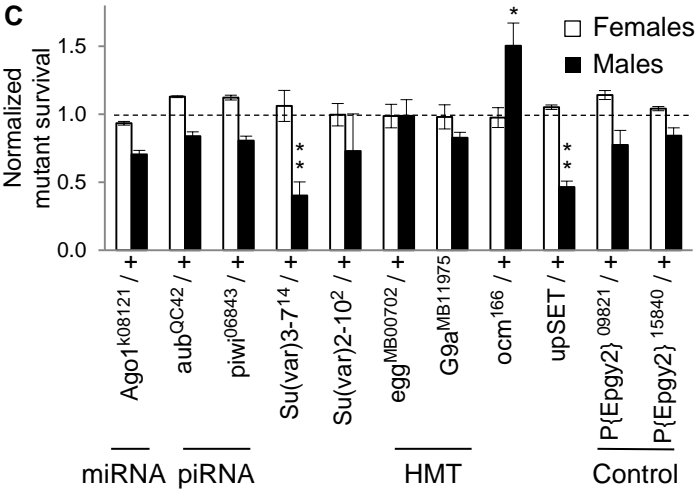

Figure 3

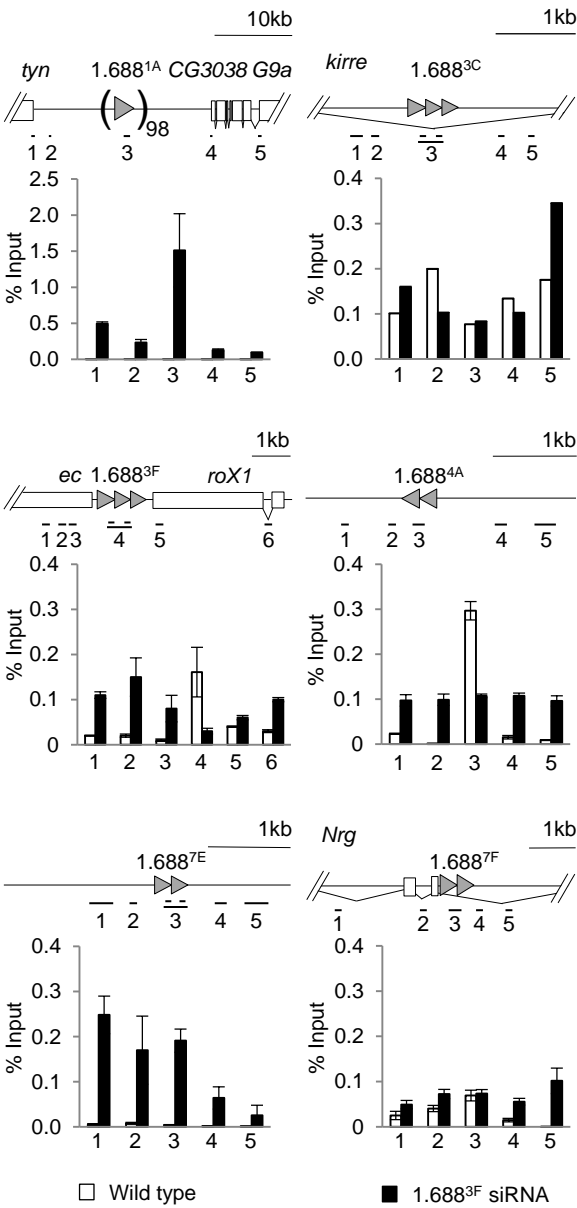

Figure 4

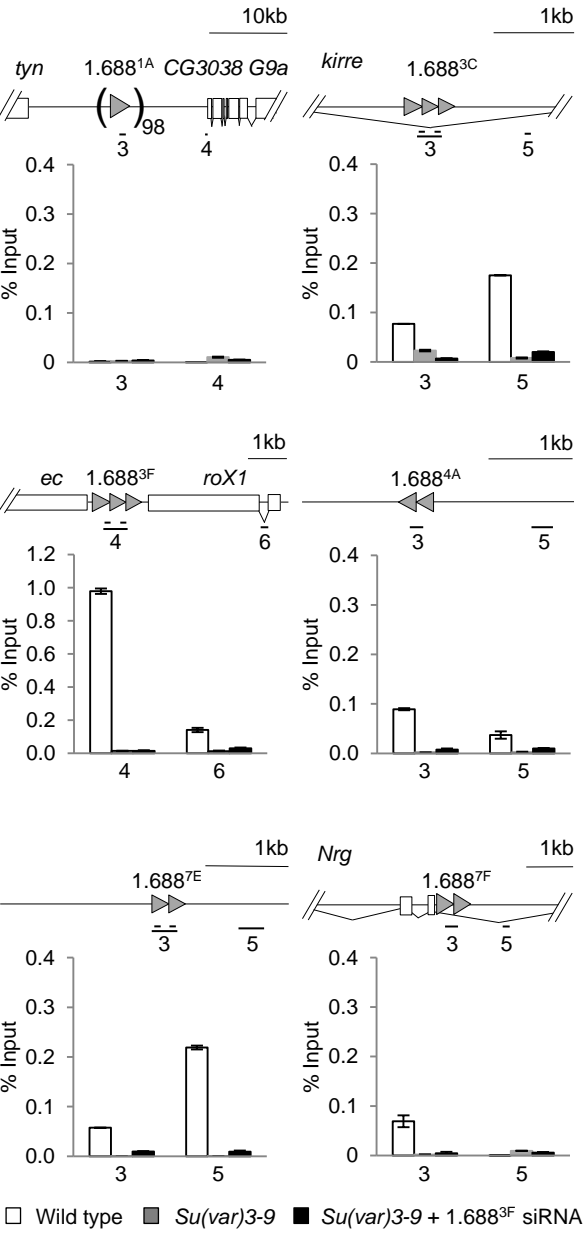

**Figure 5**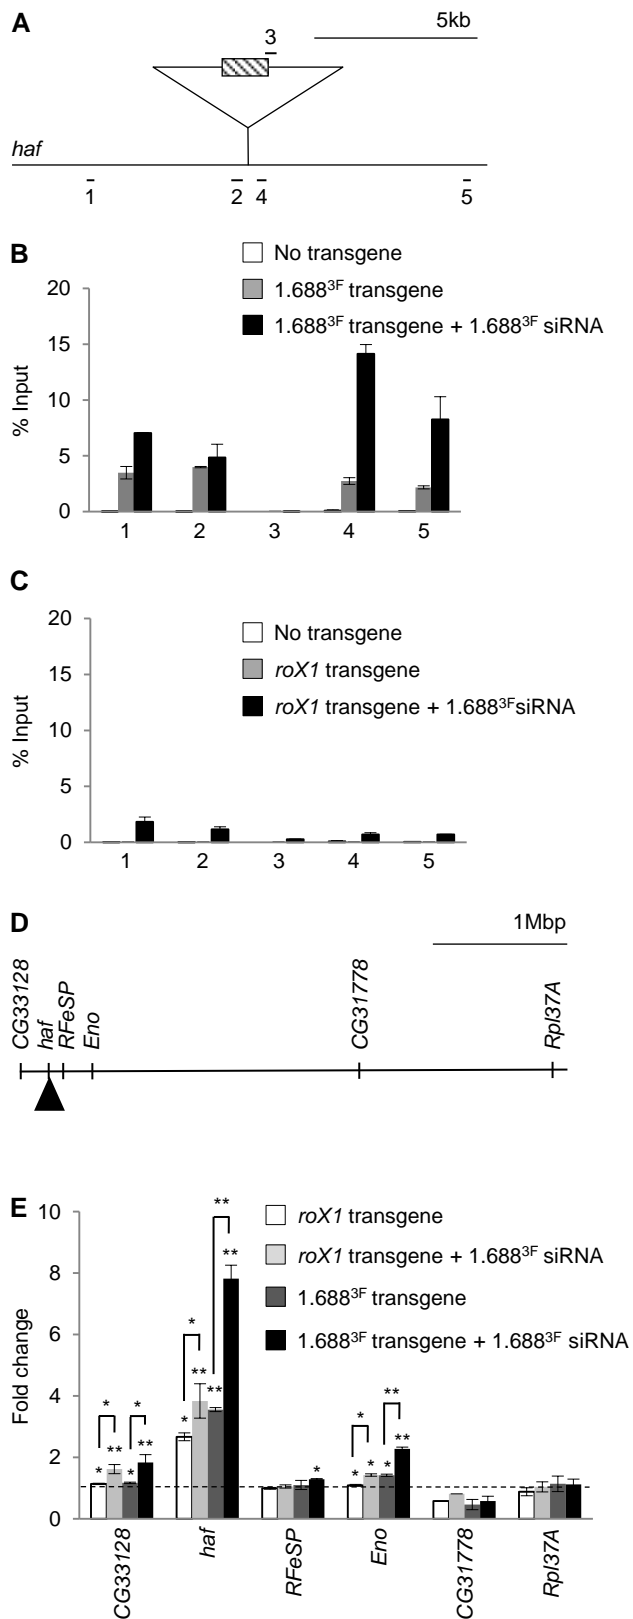



Figure 6

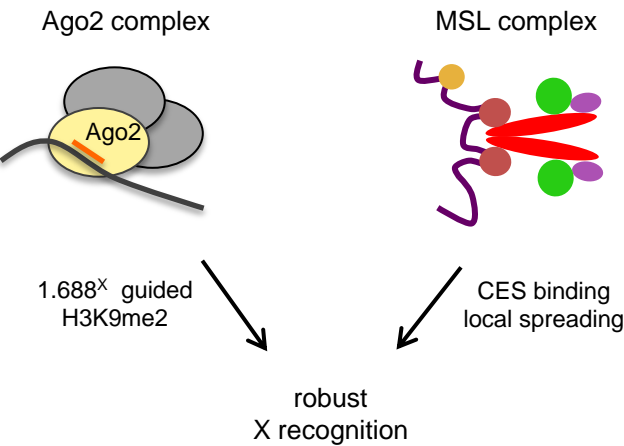

## Figure S1

A

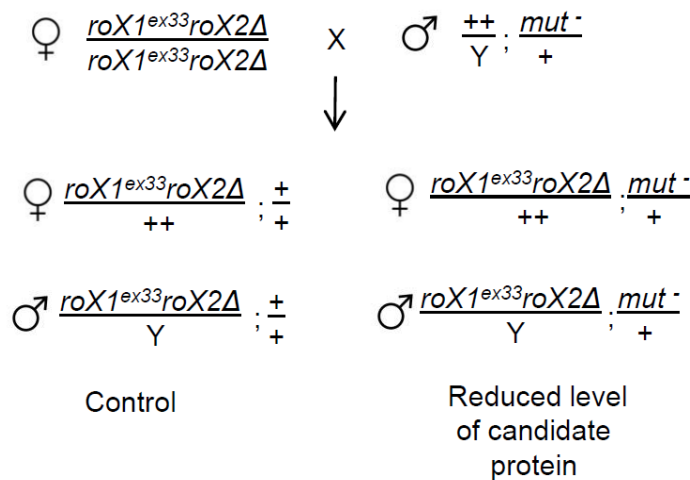

B

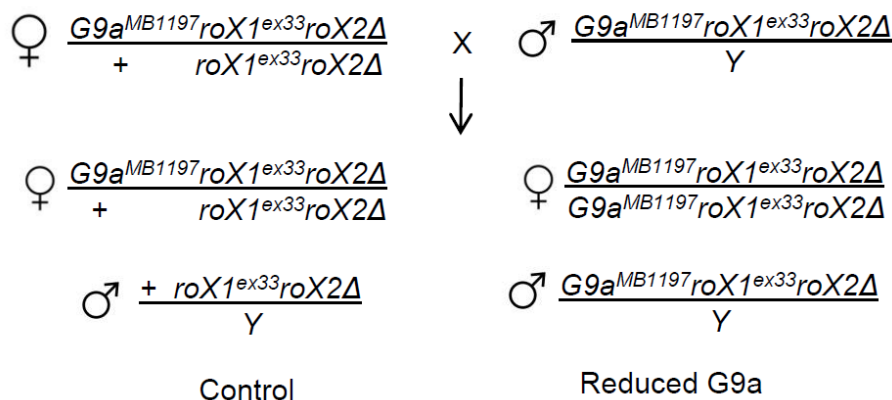

**Figure S1. Matings to detect genetic interactions between *roX1 roX2* and candidate genes.** (A) *roX1<sup>ex33</sup>roX2Δ* females were mated to males heterozygous for a mutation in the gene of interest. The survival of sons mutated for the gene of interest (bottom right) is divided by that of control brothers (bottom left) and presented in Figure 1B and C. In an otherwise wild type background, *roX1<sup>ex33</sup>roX2Δ* allows 20 % adult male escapers. Females do not dosage compensate and serve as an internal control. (B) Testing for genetic interaction between G9a and *roX1<sup>ex33</sup>roX2Δ*. Heterozygous *G9a<sup>MB1197</sup>roX1<sup>ex33</sup>roX2Δ* females were mated to *G9a<sup>MB1197</sup>roX1<sup>ex33</sup>roX2Δ* males. *G9a<sup>MB1197</sup>* is marked with EGFP. The survival of *G9a<sup>MB1197</sup>roX1<sup>ex33</sup>roX2Δ* sons (EGFP-positive, right) was divided by that of EGFP-negative + *roX1<sup>ex33</sup>roX2Δ* sons (left). EGFP intensity differentiates daughters that are homozygous or heterozygous for *G9a<sup>MB1197</sup>*.

**Figure S2**

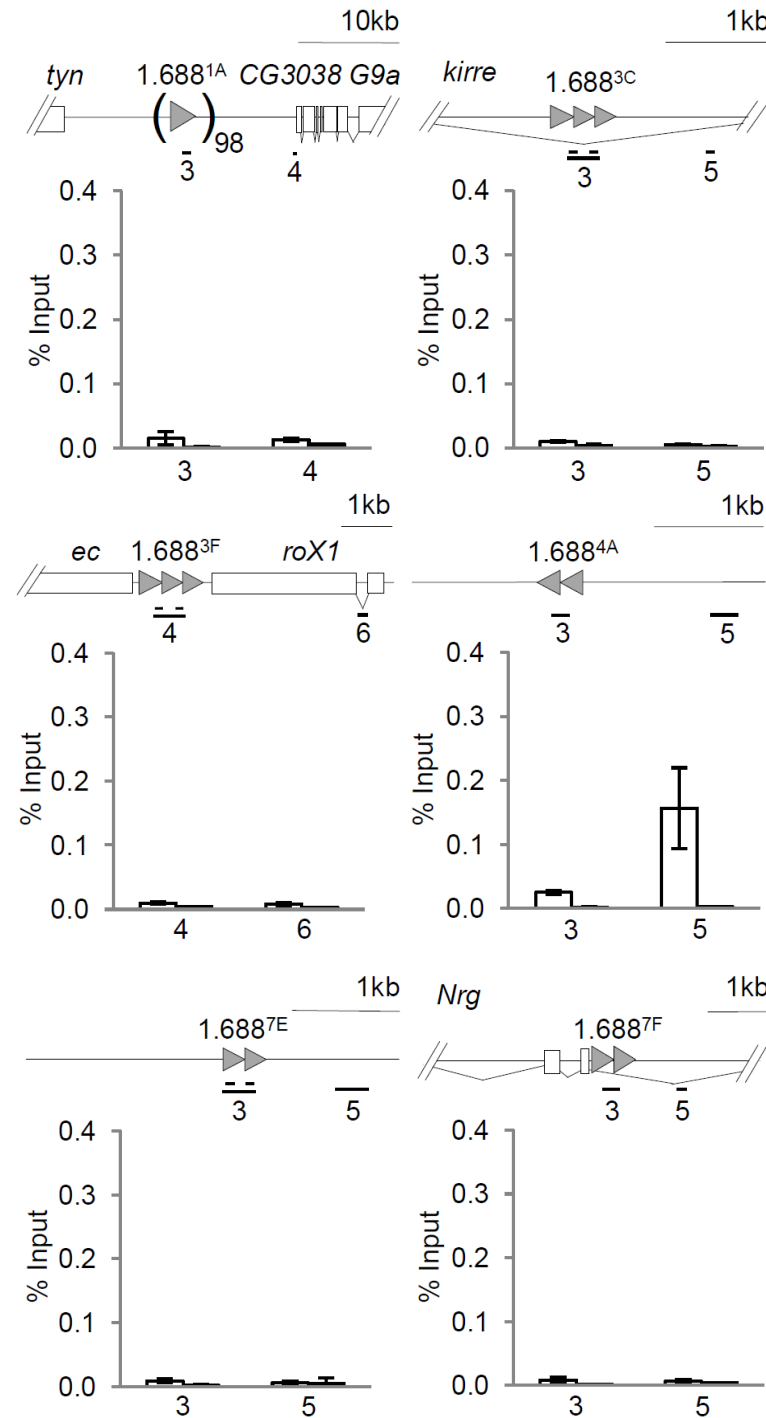

**Figure S2. H3K9me3 is not enriched over 1.688<sup>x</sup> repeats or altered by ectopic expression of 1.688<sup>3F</sup> siRNA.** Chromatin from 6-12 hr embryos was immunoprecipitated with antibody to H3K9me3. DNA was analyzed by qPCR using primers within 1.688<sup>x</sup> repeats (gray triangles) or in flanking regions. Approximately 100 copies of 1.688<sup>1A</sup> are present between *tyn* and *CG3038*. Primers indexed by gene and amplicon number are presented in Table S1. No significant enrichment within repeats, or change in H3K9me3 within repeats, is observed following siRNA expression. Standard error is derived from two biological replicates.

**Figure S3**

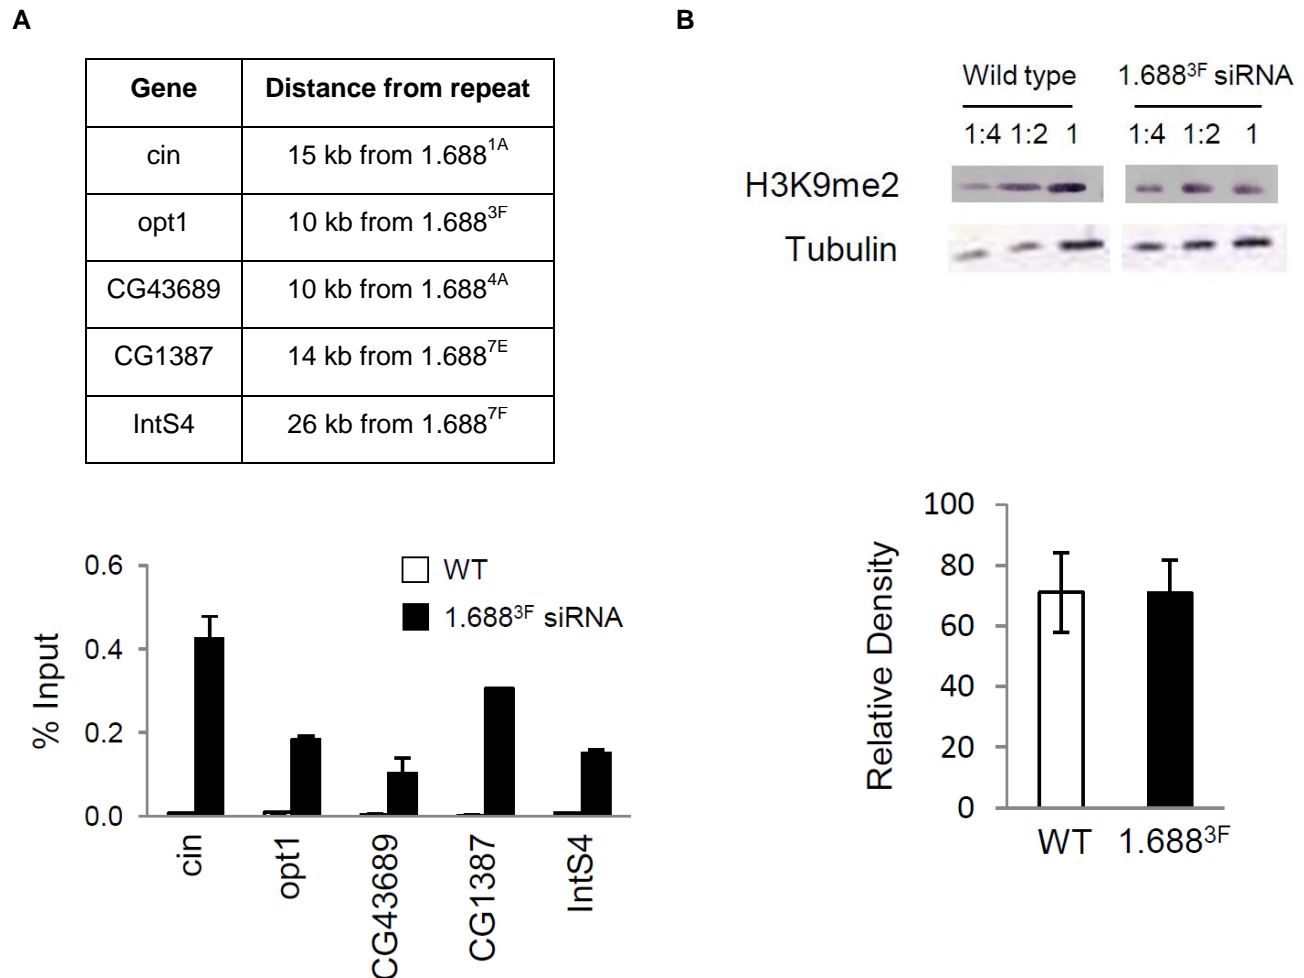

**Figure S3. Widespread alteration in H3K9me2 around 1.688<sup>x</sup> repeats is not reflected in global H3K9me2 level.** (A) Genes over 20 kb from 1.688<sup>x</sup> repeats display increased H3K9me2 following ectopic 1.688<sup>3F</sup> siRNA production. (B) Western blot of histones from control (wild type) and 1.688<sup>3F</sup> siRNA-expressing embryos does not detect a change in H3K9me2 level. H3K9me2 levels in 6-12 h embryos were compared to a tubulin loading control. Sample dilution was used to confirm signal linearity. Signal intensity was determined by ImageJ software. Standard error is derived from three biological replicates.

**Figure S4**

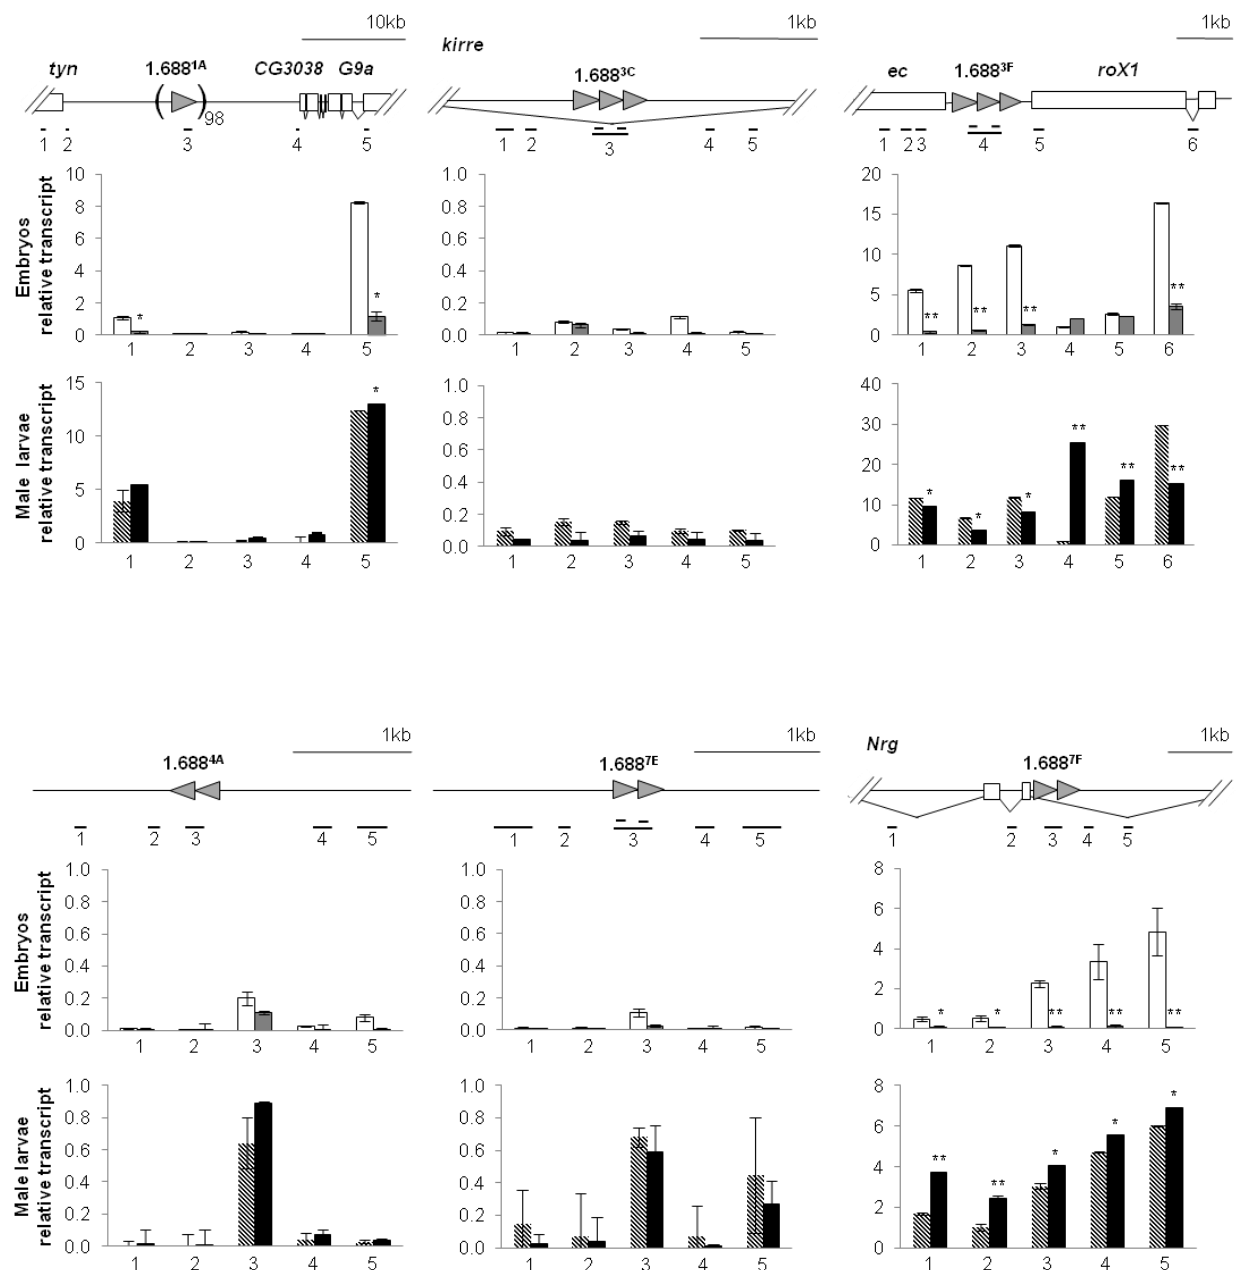

**Figure S4. Accumulation of transcripts from 1.688<sup>X</sup> repeats and surrounding regions is influenced by 1.688<sup>3F</sup> siRNA.** Transcript accumulation in 6-12 h embryos (white and gray bars) and male larvae (hatched and black bars) was measured by quantitative RT-PCR. White and hatched bars are controls. Gray and black bars express 1.688<sup>3F</sup> siRNA. Expression is normalized to *dmn*. Standard error is derived from two biological replicates. Significance was determined using Student's two sample *t*-test,  $\leq 0.05$  (\*),  $\leq 0.001$  (\*\*) significance. Primers are presented in Table S1.

**Figure S5**

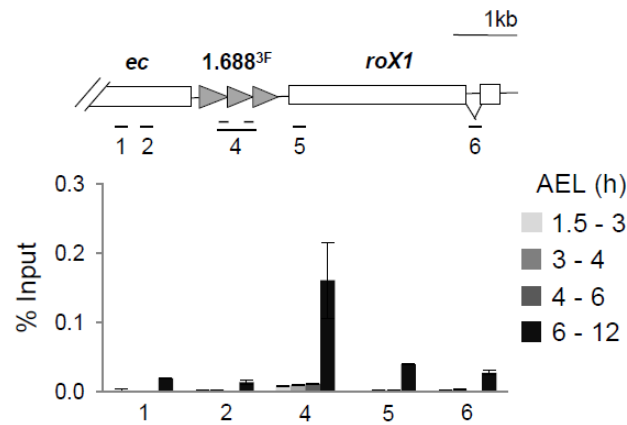

**Figure S5. H3K9me2 deposition on 1.688<sup>3F</sup> chromatin occurs 6-12 h AEL.** Chromatin from staged embryos was subjected to ChIP for H3K9me2. X-localization of the MSL complex is first detected at 3 h AEL (after egg laying), but H3K9me2 enrichment is not apparent until 6-12 h AEL. Standard error is derived from two biological replicates.

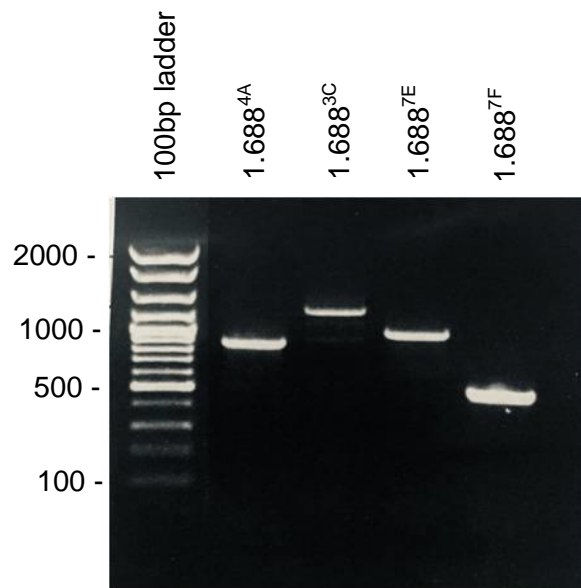

**Figure S6. Determination of tandem repeat number in the laboratory reference strain.** The size of amplicons templated with DNA from the laboratory reference yw strain were used to estimate the number of tandem repeats in 1.688<sup>4A</sup>, 1.688<sup>3C</sup>, 1.688<sup>7E</sup>, and 1.688<sup>7F</sup> (see File S1).

**Table S1. Primers used in this study**

**ChIP control regions**

| Gene name | Primer name        | Sequence                      | Working Conc. (nM) | % Efficiency |
|-----------|--------------------|-------------------------------|--------------------|--------------|
| Hsp70     | hsp70 -200F        | TGCCAG AAAGAAACTCGAGAAA       | 300                | 95.6         |
|           | hsp70 -108R        | GACAGAGTGAGAGAGCAATAGTACAGAGA |                    |              |
| dmn       | Dmn P2 left        | AGATTGAGCAGAAGCAGGGA          | 300                | 99.8         |
|           | Dmn P2 right       | CAGCAGCTCCTTGTTGTTCA          |                    |              |
|           | H3K9me2 control F2 | TCTCATGTGGGACTGAGGGAA         | 300                | 96.9         |
|           | H3K9me2 control R2 | CCGTCATCGACGGTCAAGT           |                    |              |

**ChIP at 1.688<sup>1A1</sup>**

| Amplicon No. | Primer name  | Sequence                  | Working Conc. (nM) | % Efficiency |
|--------------|--------------|---------------------------|--------------------|--------------|
| 1            | 1A F2 3' Tyn | GGAATAAGCTGCGAGCCCGTAC    | 150                | 91.3         |
|              | 1A R2 3' Tyn | AATGTGGTCTCGTGTGAGTACGTAA |                    |              |
| 2            | 1A1 L ND F1  | AGTGCTCTGTGTGCATTGGT      | 500                | 103.2        |
|              | 1A1 L ND R1  | GTGGCGAAGCCAGTTTTTCAG     |                    |              |
| 3            | 1A1 ND F1    | TCCGATTTTTGGCAAT          | 500                | 98.2         |
|              | 1A1 ND R1    | AAGCGTAAATGAAGAC          |                    |              |
| 4            | 1A1 R ND F1  | TGTCTTAGCCTTTAGAACTAAGTGT | 300                | 103          |
|              | 1A1 R ND R1  | CGACAAAACGCGGAATGTCTT     |                    |              |
| 5            | 1A F4 G9a    | GACACGCCCCTTCAGTTACTGATG  | 300                | 97.4         |
|              | 1A R4 G9a    | CGGGTCTTATTTTCCTGGCTCG    |                    |              |

**ChIP at 1.688<sup>3C</sup>**

| Amplicon No. | Primer name | Sequence                  | Working Conc. (nM) | % Efficiency |
|--------------|-------------|---------------------------|--------------------|--------------|
| 1            | 3CL F2      | TTTTTAGCTATGCCCCGCGA      | 150                | 93.3         |
|              | 3CL R2      | GGCAAGCGGAAACACTGAAG      |                    |              |
| 2            | 3CL F1      | CTGGCGTGAATGTAGCTCGTAA    | 300                | 98.2         |
|              | 3CL R1      | GCTCCGTTTCTCTGCCGTATT     |                    |              |
| 3            | 3C F1       | CCAATCCAACGTGAACCCCGA     | 500                | 94.8         |
|              | 3C R1       | TTTGTAAGGGGTAACATCATGAAAA |                    |              |



|   |        |                       |     |      |
|---|--------|-----------------------|-----|------|
| 4 | 3CR F2 | TCAAGGATGCTGCGGTTTTG  | 300 | 96.8 |
|   | 3CR R2 | CACTCCAGCATGCAGGTTAAT |     |      |
| 5 | 3CR F3 | CCAACTTGTGTGGCTAAGCTC | 300 | 94.2 |
|   | 3CR R3 | GCCGCTTTTAGTCGGATTTC  |     |      |

#### ChIP at 1.688<sup>3F</sup>

| Amplicon No. | Primer name  | Sequence                      | Working Conc. (nM) | % Efficiency |
|--------------|--------------|-------------------------------|--------------------|--------------|
| 1            | Ec F2        | GCCAGCTAACAGGCGAATTG          | 300                | 95.1         |
|              | Ec R2        | GTCACAGCGGGAAGTTCTCA          |                    |              |
| 2            | Ec F3        | AGTGTTGCGACTTCAGAGCA          | 300                | 97.9         |
|              | Ec R3        | ATGTTGCTGGGCATTGGGTA          |                    |              |
| 3            | Ec F5        | TGAACCAGCGCAGATGATGA          | 300                | 99.1         |
|              | Ec R5        | TCCTTGCGGCTCCTTATTG           |                    |              |
| 4            | RNR1 F1      | TATTTACAAACGGGGTTATCTCTATAAGG | 500                | 100.5        |
|              | RNR1 R3      | CGTAACAAAATTTCTATCGACCT       | 300                |              |
| 5            | 3F ChIP F3   | TCGGCTCAGGCGTATAACGA          | 300                | 102.2        |
|              | 3F ChIP R3   | TGAAATGAACACAGCCAAAGCA        |                    |              |
| 6            | roX1 ChIP F2 | TGCCGCCAAAGACTGATGAT          | 300                | 101          |
|              | roX1 ChIP R2 | CCTTGACGAGTCCGGACAAT          |                    |              |

#### ChIP at 1.688<sup>4A</sup>

| Amplicon No. | Primer name | Sequence               | Working Conc. (nM) | % Efficiency |
|--------------|-------------|------------------------|--------------------|--------------|
| 1            | 4A L ND F3  | GCCATTCCTCCCTCCCAAGTTA | 300                | 92.5         |
|              | 4A L ND R3  | GCGATTGCTGTGCCATTTC    |                    |              |
| 2            | 4AL ND F'2  | CCGCCTCTGTCGTACTTTCA   | 150                | 90           |
|              | 4AL ND R'2  | TCATTTCTTCGGCTTGGCT    |                    |              |
| 3            | 4A ND F1    | AAGTCTCGTAGGACGCAGGA   | 150                | 96.9         |
|              | 4A ND R1    | GTACCTCGCACTTGCTGACT   |                    |              |
| 4            | 4A R ND F2  | CATTTGTCTGCTGCGTGAGC   | 300                | 101.6        |

|   |            |                       |     |      |
|---|------------|-----------------------|-----|------|
|   | 4A R ND R2 | TGCTGCGTCTTGACTTTTCGT |     |      |
| 5 | 4A R ND F4 | CATTGAAGCGGTTGCGGATT  | 150 | 98.7 |
|   | 4A R ND R4 | TGGGGTTATTTTCGGAGGGC  |     |      |

#### ChIP at 1.688<sup>7E</sup>

| Amplicon No. | Primer name | Sequence                 | Working Conc. (nM) | % Efficiency |
|--------------|-------------|--------------------------|--------------------|--------------|
| 1            | 7E L ND F4  | AGATGTGGTCAAACACTGCG     | 300                | 104.3        |
|              | 7E L ND R4  | AAACCGAAACCGAGAACCAGA    |                    |              |
| 2            | 7E L ND F2  | TAGCCTGACACAAGCAAGGG     | 150                | 102.9        |
|              | 7E L ND R2  | GCCCCTAATGAAGTCAACCAG    |                    |              |
| 3            | 7E ND F1    | CTAAAAATGGCCACACAACCA    | 150                | 99.3         |
|              | 7E ND R1    | GTCCTTCCAAAAGTGATAGGGATG |                    |              |
| 4            | 7E R ND F1  | ACGCGGCCTTTTCATCATTT     | 300                | 90.3         |
|              | 7E R ND R1  | GCCCCCTTACTCTGGCATCT     |                    |              |
| 5            | 7E R ND F3  | GGAAAGCCCAACCAGAATGC     | 300                | 102.4        |
|              | 7E R ND R3  | GCATCGAGCGACCCAAGTTA     |                    |              |

#### ChIP at 1.688<sup>7F</sup>

| Amplicon No. | Primer name | Sequence              | Working Conc. (nM) | % Efficiency |
|--------------|-------------|-----------------------|--------------------|--------------|
| 1            | 7F L ND F3  | CCACTTGGGCTTCAATCGTA  | 150                | 101          |
|              | 7F L ND R3  | GCTTGGGGAATACGAGGCA   |                    |              |
| 2            | 7F L ND F2  | TCTGGTCCTTCGCTGCATTT  | 150                | 102.5        |
|              | 7F L ND R2  | GCGACGATATTTGCCTTGGG  |                    |              |
| 3            | 7F ND F2    | ATCGCCCAACCAAGAATCACC | 150                | 101.8        |
|              | 7F ND R2    | TCTTCTTCTCGTGCCTTTGCT |                    |              |
| 4            | 7F R ND F2  | ATGCAGGTCGCATTGAGGAA  | 150                | 107          |
|              | 7F R ND R2  | CAATGGTCACCCACCCAAGT  |                    |              |
| 5            | 7F R ND F4  | CGACGTTGGCAGAATAGCAA  | 300                | 94.7         |
|              | 7F R ND R4  | CCAAAGGAAAAGCGCACACA  |                    |              |

### ChIP at a distance from repeats

| Gene name  | Primer name | Sequence             | Working Conc. (nM) | % Efficiency |
|------------|-------------|----------------------|--------------------|--------------|
| cin        | Cin F2      | CTGGTAGCGAAAAGGCCGTA | 150                | 101.8        |
|            | Cin R2      | CCTCAGCATGTGTTTTCCGC |                    |              |
| opt1 (yin) | Yin F       | GGTGATTGCCGAATTCAAGT | 300                | 110.1        |
|            | Yin R       | ACTAGCATAAGGCTGGCGAA |                    |              |
| CG43689    | CG43689 F1  | CCCCACAGGTGAGTCATTCC | 300                | 102.1        |
|            | CG43689 R1  | TGCGGGCTCGTAATAATGCT |                    |              |
| CG1387     | CG1387 F1   | ACGCTCCATGTCCTTTACGG | 300                | 95.7         |
|            | CG1387 R1   | CGTTTCGCTTTGCTTTTGCG |                    |              |
| IntS4      | IntS4 F1    | CACACAGCGGCGTATTTTGT | 300                | 94.9         |
|            | IntS4 R1    | TGCCCATGAAAGAGTCGGTC |                    |              |

### ChIP at 2L integration site

| Amplicon No. | Primer name                   |               | Sequence                   | Working Conc. (nM) | % Efficiency |
|--------------|-------------------------------|---------------|----------------------------|--------------------|--------------|
| 1            | SJTG-5kbL flanking F1         |               | AGTTCATCGCCGGATCACTG       | 150                | 97.7         |
|              | SJTG-5kbL flanking R1         |               | AAAGCGGAGCAGATGGACTT       |                    |              |
| 2            | SJTG-L flanking F1            |               | TCGACTTTGCTCAACACACAA      | 500                | 97.3         |
|              | SJTG-L flanking R1            |               | ACCCGCATTTCCATTTTGCG       |                    |              |
| 3            | 1.688 <sup>3F</sup> insertion | roX1 HincII R | CTCAATAGCATAAAAAATAGTTGACC | 300                | 91.3         |
|              |                               | Sat_LoxP_R    | CGACCGTTGCGGCCTTCGTATAGCAT |                    |              |
| 3            | roX1 insertion                | roX1R_706     | TCATATCCACTAGCATAAGGCTGGCG | 300                | 103.4        |
|              |                               | roX1_LoxP_F   | ATCGGTCGGCGGCTTCGTATAATGTA |                    |              |
| 4            | SJTG-R flanking F1            |               | TACAGTAAGCCACCACCGAT       | 300                | 97.6         |
|              | SJTG-R flanking R1            |               | GCGGCAGTCTGTTATCTCTGT      | 500                |              |
| 5            | SJTG-5kbR flanking F2         |               | GTCTGTAGCAGCAAGCGGTA       | 150                | 94.2         |
|              | SJTG-5kbR flanking R2         |               | ATCCTGTTGACTGACTGCCG       |                    |              |

## Quantitative RT-PCR primers

### Genes on 2L and normalizer

| Gene name | Primer name | Sequence              | Working Conc. (nM) | % Efficiency |
|-----------|-------------|-----------------------|--------------------|--------------|
| CG33128   | J1_F2       | AACCGACCAGAACCTCATCG  | 150                | 98.4         |
|           | J1_R2       | TCACGGTTCCATTCCAGGTG  |                    |              |
| haf       | Hap F2      | AGCTGAACCTGCTGGATTT   | 300                | 95.6         |
|           | Hap R2      | AGGGTGGACAGCTTTGTTAG  |                    |              |
| RFeSP     | J2_F3       | AAATGATGAACGCCGTGTCTG | 300                | 89.2         |
|           | J2_R3       | GCAGAGCCTTACCCATCGAG  |                    |              |
| Eno       | J3_F1       | ATGTCTTGGACCGCTTCAGT  | 150                | 102.1        |
|           | J3_R1       | GCCCTTTCGATTGGGGTGA   |                    |              |
| CG31778   | J10_F2      | AACCATTCACTGCAGAGGCG  | 150                | 95.7         |
|           | J10_R2      | CCGAAGTCATTGCCCTCAGAA |                    |              |
| Rpl37A    | J8_F1       | GAGCGCCAAATGGTGACAAA  | 500                | 108.6        |
|           | J8_R1       | CAGGACCAGATGCCCACAAC  |                    |              |
| dmn       | Dmn_F       | GACAAGTTGAGCCGCCTTAC  | 300                | 98.5         |
|           | Dmn_R       | CTTGGTGCTTAGATGACGCA  |                    |              |

## **File S1. Estimating tandem repeat copy number in the laboratory reference strain.**

To determine the number of tandem repeats at various cytological positions in the laboratory reference (yw) strain, we performed PCR using primers flanking each repeat cluster. The length of the amplicon attributable to repeats was divided by 359 to obtain the copy number. Prior studies have shown that the copy number of 1.688<sup>3F</sup> repeats in the laboratory reference strain is 3.5 (Menon et al., 2014). The 1.688<sup>4A</sup>, 1.688<sup>3C</sup>, 1.688<sup>7E</sup>, and 1.688<sup>7F</sup> repeat clusters span 850 bp, 1200 bp, 900 bp, and 500 bp, respectively, bringing their copy numbers to 2.5, 3.5, 2.5, and 1.5 (Figure S6, Table 1). As the 1.688<sup>1A</sup> repeats have a copy number of ~100, it was not possible to use this method to determine 1.688<sup>1A</sup> repeat length or copy number in the laboratory reference strain.

## File S2. Selection criteria for Ago2-interacting proteins

Four criteria were used to rank Ago2-interactors in the Biological General Repository for Interaction Datasets (BioGRID) version 3.4.144, a manually curated database containing high-probability protein interactions (Stark et al., 2006), or identified by the Easy Networks (esyN) search engine (Bean et al., 2014). As BioGRID represents a subset of esyN interactions, all BioGRID interactions in Table S2 are also present in esyN. The Curation Score in Table S2 is the sum of four criteria. The method of detection was scored 0 if high throughput, and 1 if low throughput or experimentally validated. Additional criteria are: a known role in RNA interference; chromatin modification; and chromatin association. Proteins received a score of 1 for each criterion satisfied and 0 if unsatisfied. Most proteins with a score of 2 or more were tested for genetic interaction with *roX1 roX2*. Phosphatidylinositol glycan anchor biosynthesis class S (PIG-S, curation score 1) was also tested. No genes with a score  $\leq 2$  displayed a genetic interaction with *roX1 roX2*, but several with scores of 3 or 4 enhanced the lethality of *roX1 roX2* males, suggesting a role in dosage compensation (Table S2, Figure 2).

**Table S2. Ago2-interactors ranked by manual curation.**

| Protein                                                 | Symbol        | EsyN ID     | Database | Curation score | roX1 roX2 interaction  |
|---------------------------------------------------------|---------------|-------------|----------|----------------|------------------------|
| Dicer-1                                                 | Dcr1          | FBgn0039016 | BioGRID  | 4              | Yes                    |
| Dicer-2                                                 | Dcr2          | FBgn0034246 | esyN     | 4              | Yes                    |
| Elongator complex protein 1                             | Elp1          | FBgn0037926 | esyN     | 4              | Yes                    |
| Fragile X mental retardation                            | Fmr1          | FBgn0028734 | BioGRID  | 4              | Yes                    |
| r2d2                                                    | r2d2          | FBgn0031951 | esyN     | 4              | No                     |
| Rm62                                                    | Rm62          | FBgn0003261 | BioGRID  | 4              | Yes                    |
| Small ribonucleoprotein particle protein 1              | SmD1          | FBgn0261933 | esyN     | 4              | No                     |
| TBP-associated factor 11                                | Taf11         | FBgn0011291 | esyN     | 4              | No                     |
| vasa intronic gene                                      | vig           | FBgn0024183 | esyN     | 4              | Yes                    |
| barren                                                  | barr          | FBgn0014127 | esyN     | 3              | Yes                    |
| belle                                                   | bel           | FBgn0263231 | esyN     | 3              | No                     |
| CTCF                                                    | CTCF          | FBgn0035769 | esyN     | 3              | No (tested previously) |
| smaug                                                   | smg           | FBgn0016070 | esyN     | 3              | Yes                    |
| forkhead box, sub-group O                               | foxo          | FBgn0038197 | esyN     | 2              | No                     |
| p53                                                     | p53           | FBgn0039044 | BioGRID  | 2              | No                     |
| I-kappaB kinase $\beta$                                 | IKK $\beta$   | FBgn0024222 | BioGRID  | 2              | -                      |
| CG9302                                                  | CG9302        | FBgn0032514 | BioGRID  | 2              | -                      |
| Phosphatidylinositol glycan anchor biosynthesis class S | PIG-S         | FBgn0265190 | BioGRID  | 1              | No                     |
| Centrosomal protein 190kD                               | Cp190         | FBgn0000283 | esyN     | 1              | -                      |
| DNA fragmentation factor-related protein 2              | Drep2         | FBgn0028408 | esyN     | 1              | -                      |
| gigas                                                   | gig           | FBgn0005198 | esyN     | 1              | -                      |
| Negative elongation factor E                            | Nelf-E        | FBgn0017430 | esyN     | 1              | -                      |
| Phosphatase and tensin homolog                          | Pten          | FBgn0026379 | esyN     | 1              | -                      |
| Phosphoinositide-dependent kinase 1                     | Pdk1          | FBgn0020386 | esyN     | 1              | -                      |
| Proteasome $\alpha 7$ subunit                           | Prosa7        | FBgn0023175 | esyN     | 1              | -                      |
| pumilio                                                 | pum           | FBgn0003165 | esyN     | 1              | -                      |
| Purine-rich binding protein- $\alpha$                   | Pur- $\alpha$ | FBgn0022361 | esyN     | 1              | -                      |
| rapamycin-insensitive companion of Tor                  | riCTOR        | FBgn0031006 | esyN     | 1              | -                      |
| Ras homolog enriched in brain                           | Rheb          | FBgn0041191 | esyN     | 1              | -                      |
| Ribosomal protein S6 kinase II                          | S6kII         | FBgn0262866 | esyN     | 1              | -                      |
| RNA polymerase II 215kD subunit                         | RpII215       | FBgn0003277 | esyN     | 1              | -                      |
| Tsc1                                                    | Tsc1          | FBgn0026317 | esyN     | 1              | -                      |
| Tudor staphylococcal nuclease                           | Tudor-SN      | FBgn0035121 | esyN     | 1              | -                      |
| Ubiquitin-conjugating enzyme variant 1A                 | Uev1A         | FBgn0035601 | esyN     | 1              | -                      |

## References

- Bean, D.M., Heimbach, J., Ficorella, L., Micklem, G., Oliver, S.G., and Favrin, G. (2014). esyN: Network Building, Sharing and Publishing. *PloS one* 9, e106035.
- Menon, D.U., Coarfa, C., Xiao, W., Gunaratne, P.H., and Meller, V.H. (2014). siRNAs from an X-linked satellite repeat promote X-chromosome recognition in *Drosophila melanogaster*. *Proceedings of the National Academy of Sciences of the United States of America* 111, 16460-16465.
- Stark, C., Breitkreutz, B.J., Reguly, T., Boucher, L., Breitkreutz, A., and Tyers, M. (2006). BioGRID: a general repository for interaction datasets. *Nucleic acids research* 34, D535-539.
